# Supplementary material for: A facile transformation of amino acids to functionalized coumarins
Source: Royal Society of Chemistry journal article supplement (doi:10.1039/c1ob05815k), 2011-01-01
Supplement: c1ob05815k.pdf [file c1ob05815k.pdf]

Supporting Information for

**A Facile Transformation of Amino acids to Functionalized Coumarins**

Anupam Bandyopadhyay and Hosahudya N. Gopi\*

Department of Chemistry, Indian Institute of Science Education and Research, Sai Trinity  
Building, Garware Circle, Pashan, Pune-411021, India

Email: [hn.gopi@iiserpune.ac.in](mailto:hn.gopi@iiserpune.ac.in)

|                                                                                                                          |          |
|--------------------------------------------------------------------------------------------------------------------------|----------|
| <b>List of contents.....</b>                                                                                             | <b>2</b> |
| <b>Synthesis of Fmoc-Coumaryl amino acid starting from Z-Asp-OBn.....</b>                                                | <b>3</b> |
| <b>Crystal Structure analysis.....</b>                                                                                   | <b>4</b> |
| <b>References.....</b>                                                                                                   | <b>6</b> |
| <b>Copies of <math>^1\text{H}</math>, <math>^{13}\text{C}</math>NMR, HPLC profile and Mass Spectra for Products.....</b> | <b>7</b> |

### Synthesis of Coumarin 3g starting from Z-Asp(OH)-OBzl

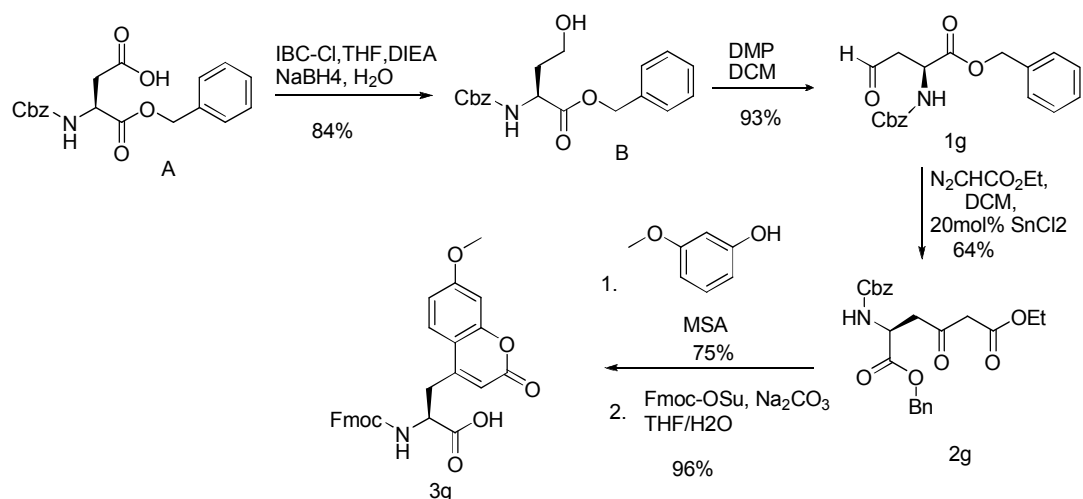

**Synthesis of alcohol B starting from Cbz-Asp(OH)-OBzl (A):** The Cbz-Asp(OH)-OBzl (10 mmol) was dissolved in dry THF (20 mL) under nitrogen atmosphere, cooled to -15 °C, and then treated with DiPEA (10.2 mmol, 1.32 g) followed by isobutyl chloroformate (10 mmol, 1.366 g). White hydrochloride salt of DiPEA was precipitated out immediately after addition of isobutyl chloroformate. The reaction was continued to stir for another 10 min. The hydrochloride salt of DiPEA was filtered and washed with THF (2 × 10 mL). The filtrate was again cooled to -15 °C under nitrogen atmosphere, and then a solution of NaBH<sub>4</sub> (20 mmol, 720 mg) in 3 mL of water was added with vigorous stirring. After completion of reaction (~10 min), THF was evaporated and the reaction mixture was diluted with EtOAc (150 mL). The organic layer was washed with 5% HCl (50 mL x 2), 5% sodium carbonate (50 mL x 2), followed by brine (50 mL). The organic layer was dried over anhydrous Na<sub>2</sub>SO<sub>4</sub> and evaporated under reduced pressure to get crude Cbz-protected alcohol (B) which was further purified on silica gel column chromatography.

**(S)-benzyl 2-(((benzyloxy)carbonyl)amino)-4-oxobutanoate (1g):** The Cbz-amino alcohol B (5 mmol) was dissolved in 50 mL of DCM at room temperature and then 2.1 g (7.5 mmol) Dess-Martin periodinane (DMP) was added. Resulting reaction mixture was stirred for about 1 hr and the progress of the reaction was monitored by TLC. After completion of the reaction, it was diluted with diethylether (50 mL) and 10% Na<sub>2</sub>CO<sub>3</sub> solution (50 mL) with

vigorous stirring. After 10 min, the organic layer was separated, washed with 10%  $\text{Na}_2\text{CO}_3$  (50 mL  $\times$  2), brine (30 mL) and dried over anhydrous  $\text{Na}_2\text{SO}_4$ . The organic layer was evaporated under reduced pressure to get Cbz-Asp(CHO)-OBzl and used immediately for the synthesis of  $\beta$ -keto-esters using the reported procedure.<sup>1</sup>

### Crystal Structure analysis

**Crystal structure analysis of Boc-Ala-Coumarin (3a):** Crystals were grown by slow evaporation from a solution of methanol/water. A single crystal (0.35  $\times$  0.30  $\times$  0.20 mm) was mounted on loop with a small amount of the paraffin oil. The X-ray data were collected at 200K temperature on a Bruker APEX DUO CCD diffractometer using Mo  $K_\alpha$  radiation ( $\lambda = 0.71073 \text{ \AA}$ ),  $\omega$ -scans ( $2\theta = 56.56$ ), for a total of 3782 independent reflections. Space group P2(1),  $a = 5.122(3)$ ,  $b = 10.085(6)$ ,  $c = 16.501(10)$ ,  $\beta = 96.065(13)$ ,  $V = 847.6(8) \text{ \AA}^3$ , Monoclinic,  $Z = 2$  for chemical formula  $\text{C}_{17}\text{H}_{21}\text{NO}_5$ , with one molecule in asymmetric unit;  $\rho$  calcd. =  $1.251 \text{ g cm}^{-3}$ ,  $\mu = 0.092 \text{ mm}^{-1}$ ,  $F(000) = 340$ ,  $R_{\text{int}} = 0.0468$ . The final R value was 0.0537 ( $wR_2 = 0.1113$ ) 1598 observed reflections ( $F_0 \geq 4\sigma(|F_0|)$ ) and 213 variables,  $S = 0.899$ . The structure was obtained by direct methods using SHELXS-97.<sup>2</sup> All non-hydrogen atoms were refined anisotropically. The hydrogen atoms were fixed geometrically in the idealized position and refined in the final cycle of refinement as riding over the atoms to which they are bonded. The largest difference peak and hole were 0.126 and  $-0.143 \text{ e \AA}^{-3}$ , respectively.

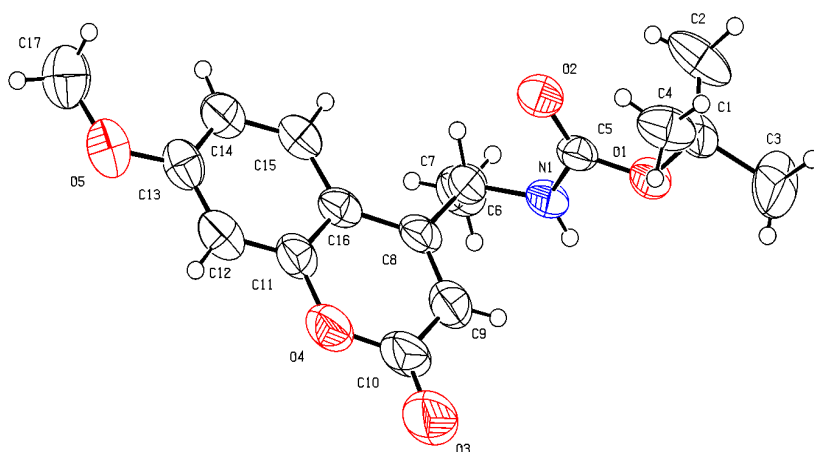

Figure 1. ORTEP diagram of Boc-Alanyl coumarin (3a). Hydrogens are not labelled for clarity.

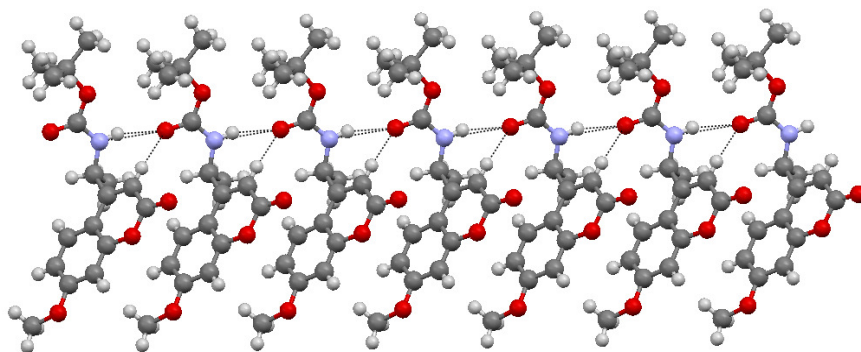

Figure 2: The extended sheet type assembly of Boc-alanylcoumarin

Table 2. Non-covalent interactions observed in the crystal structure of Boc-alanylcoumarin

|            | D-H...A[Å] | D...A[Å] | D-H...A[deg] | Type of H-bonding |
|------------|------------|----------|--------------|-------------------|
| N1---O2    | 2.128      | 2.955    | 161          | NH---CO           |
| C9-H---O2  | 2.664      | 3.468    | 145          | CH---O            |
| C7-H---O5  | 2.666      | 3.367    | 130          | CH---O            |
| C3-H---O3  | 2.700      | 3.349    | 125          | CH---O            |
| C17-H---O3 | 2.459      | 3.294    | 145          | CH---O            |

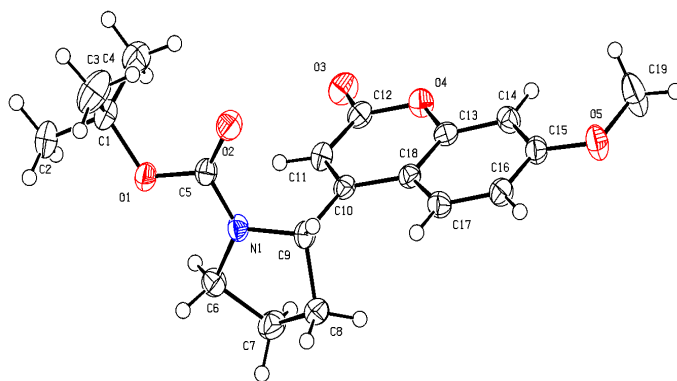

Figure 3: ORTEP diagram of Boc-prolylcoumarin. Hydrogen atoms are not labelled for clarity.

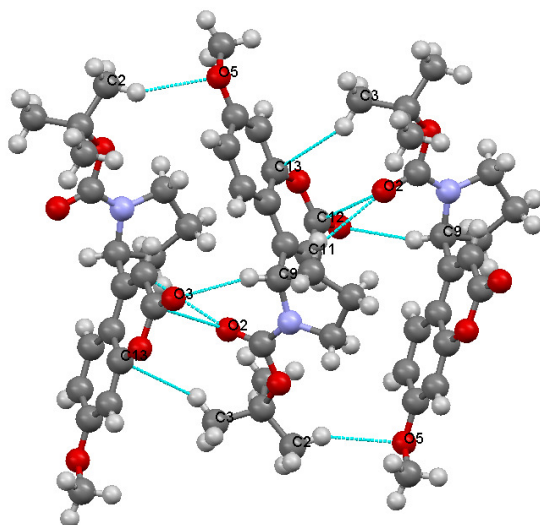

Figure 4: The crystal packing depicting the non-covalent interactions in Boc-prolylcoumarin

Table 2. Non-covalent interactions in the crystal structure of Boc-prolylcoumarin

|            | D-H...A[Å] | D...A[Å] | D-H...A[deg] | Type of H-bonding  |
|------------|------------|----------|--------------|--------------------|
| C3H...Ar   | 3.053      | ---      | ---          | C-H... $\pi$       |
| O2...Ar    | ----       | 3.037    | ---          | Lone pair... $\pi$ |
| C9-H...O3  | 2.564      | 3.514    | 163          | CH...O             |
| C19-H...O3 | 2.522      | 3.325    | 141          | CH...O             |
| C4-H...O5  | 2.614      | 3.460    | 147          | CH...O             |

## Reference

- (1) A. Bandyopadhyay, N. Agrawal, S.M. Mali, S.V. Jadhav, H.N. Gopi, *Org. Biomol. Chem.*, 2010, **8**, 4855–4860.
- (2) a) SHELXS-97: G. M. Sheldrick, *Acta Crystallogr. Sect A* 1990, **46**, 467-473. b) G. M. Sheldrick, SHELXL-97, Universitat Gottingen (Germany) 1997.

### $^1\text{H}$ , $^{13}\text{C}$ NMR, HPLC profile and MALDI-TOF Mass Data

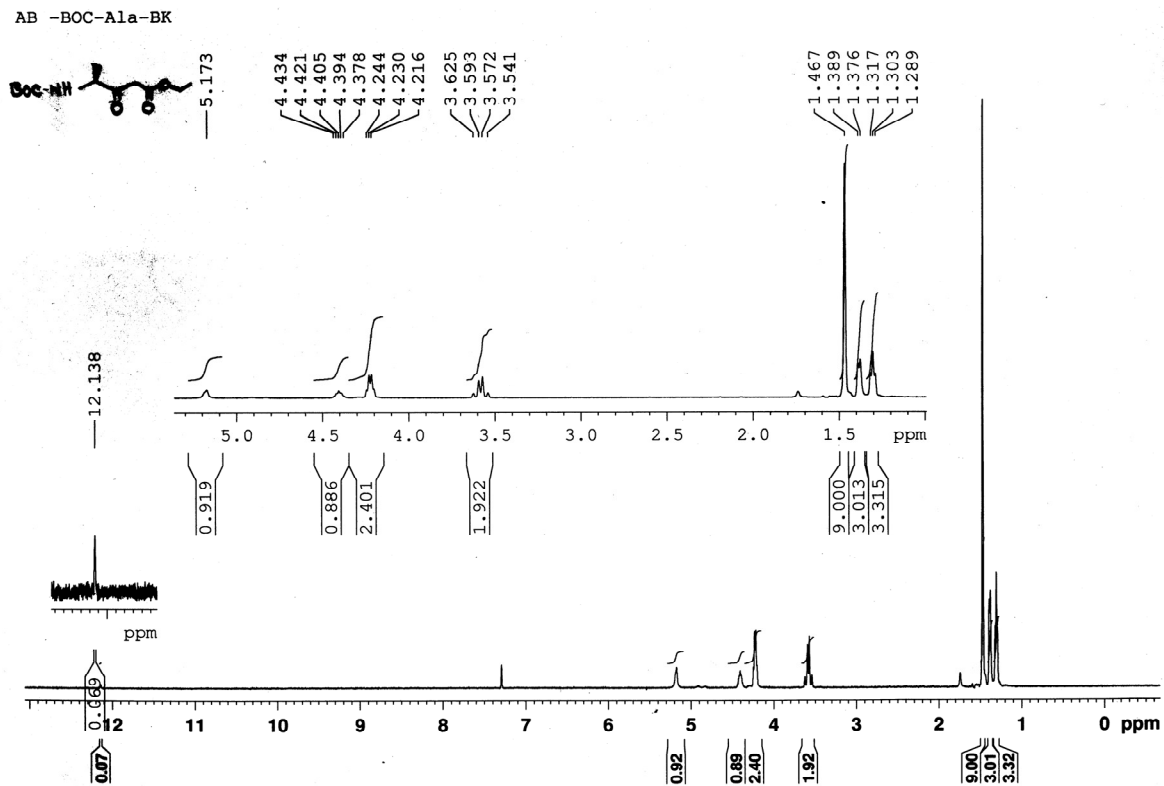

AB -BOC-Ala-BK  
13C CDCl3  
120509-30

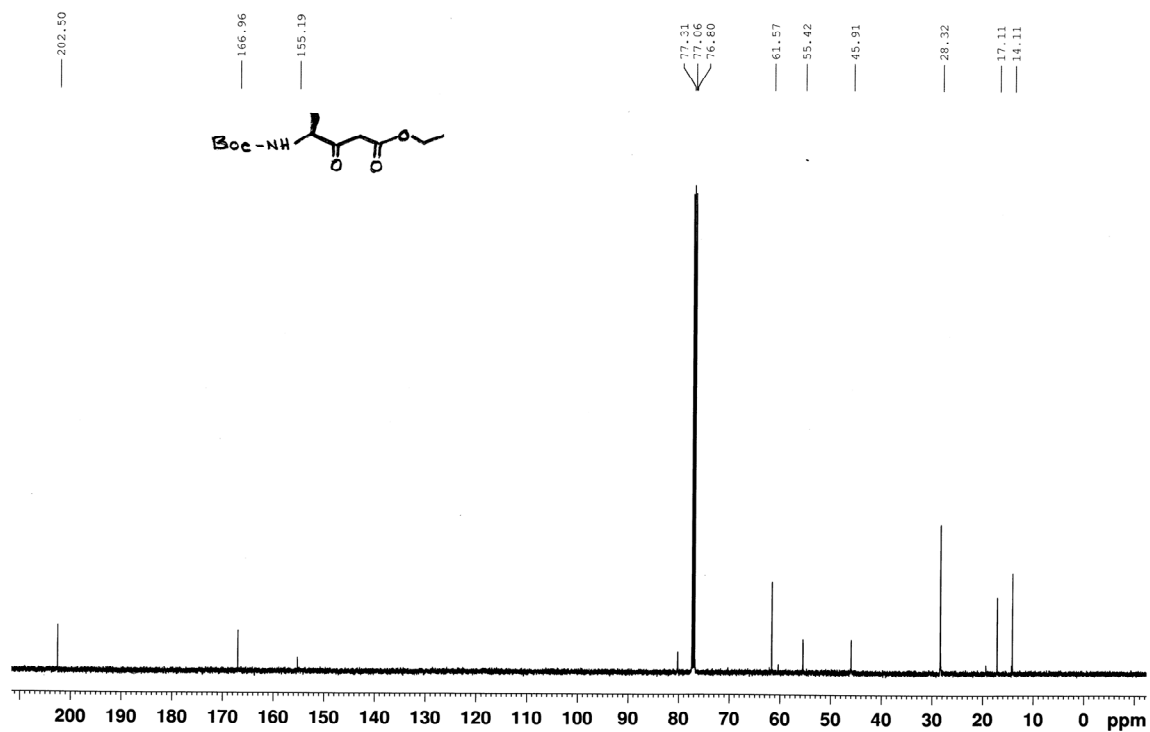



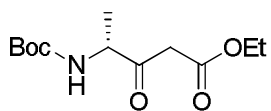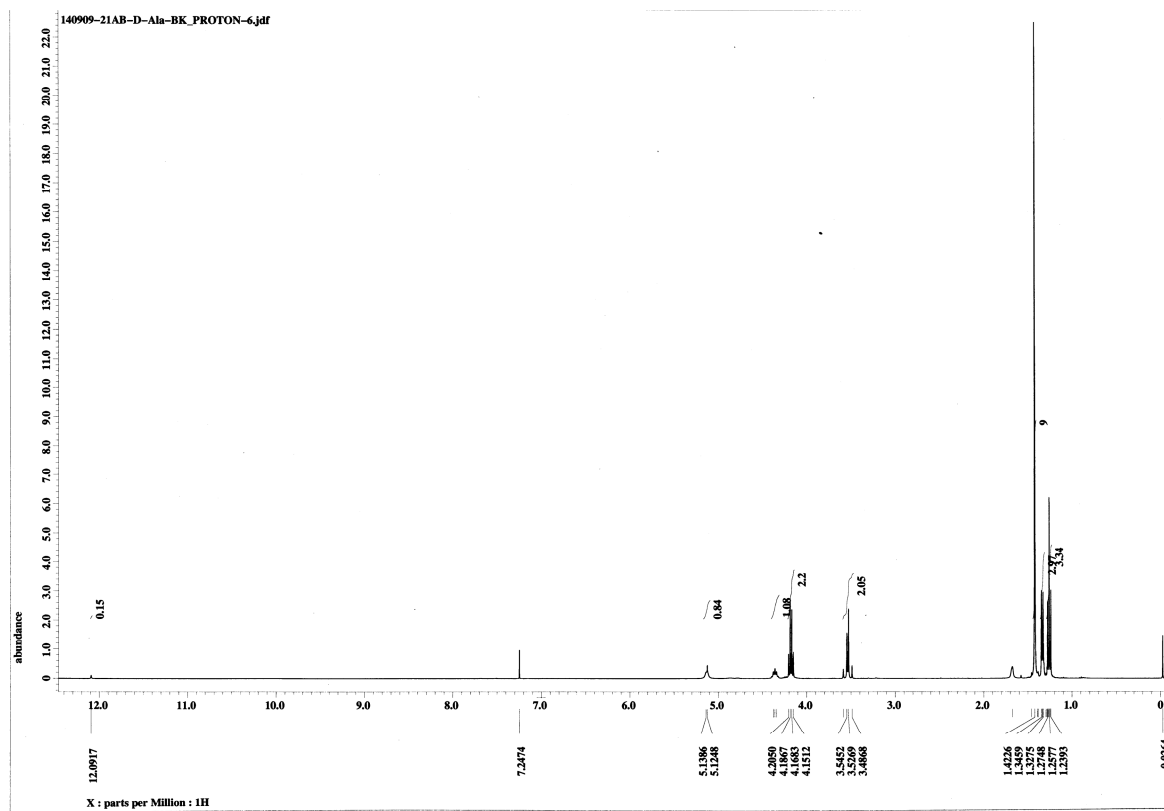

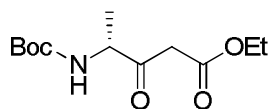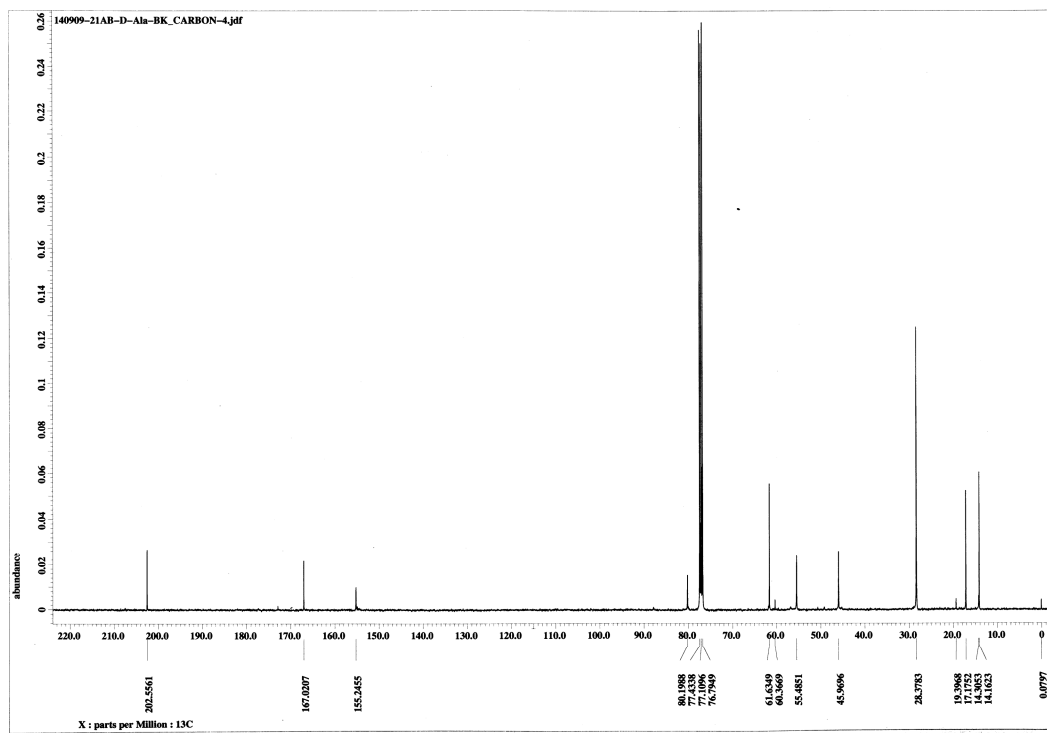

AB Boc-Val-BK  
1H CDCl3  
110509-67

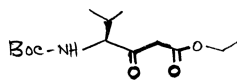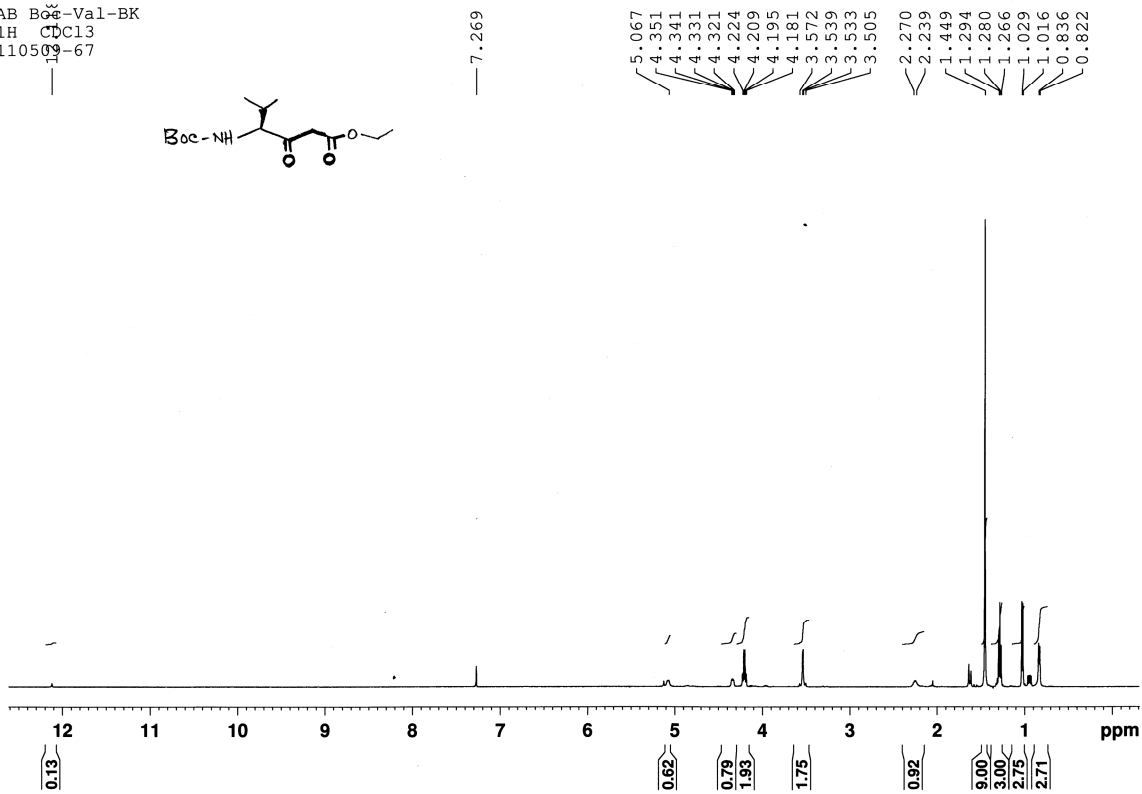

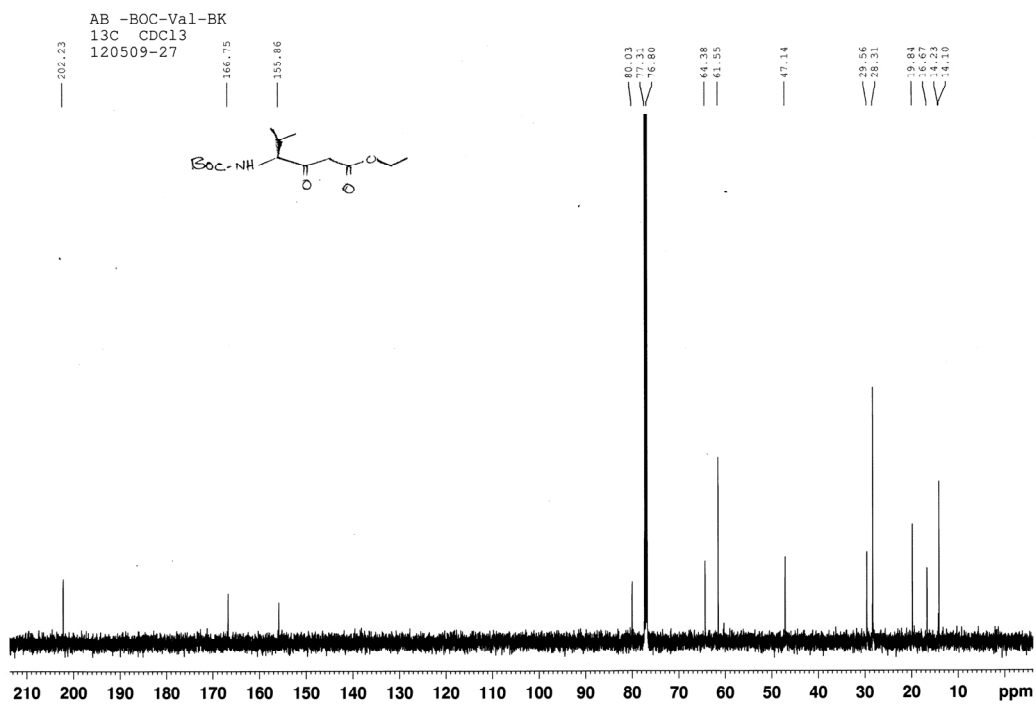

AB -BOC-Leu-BK

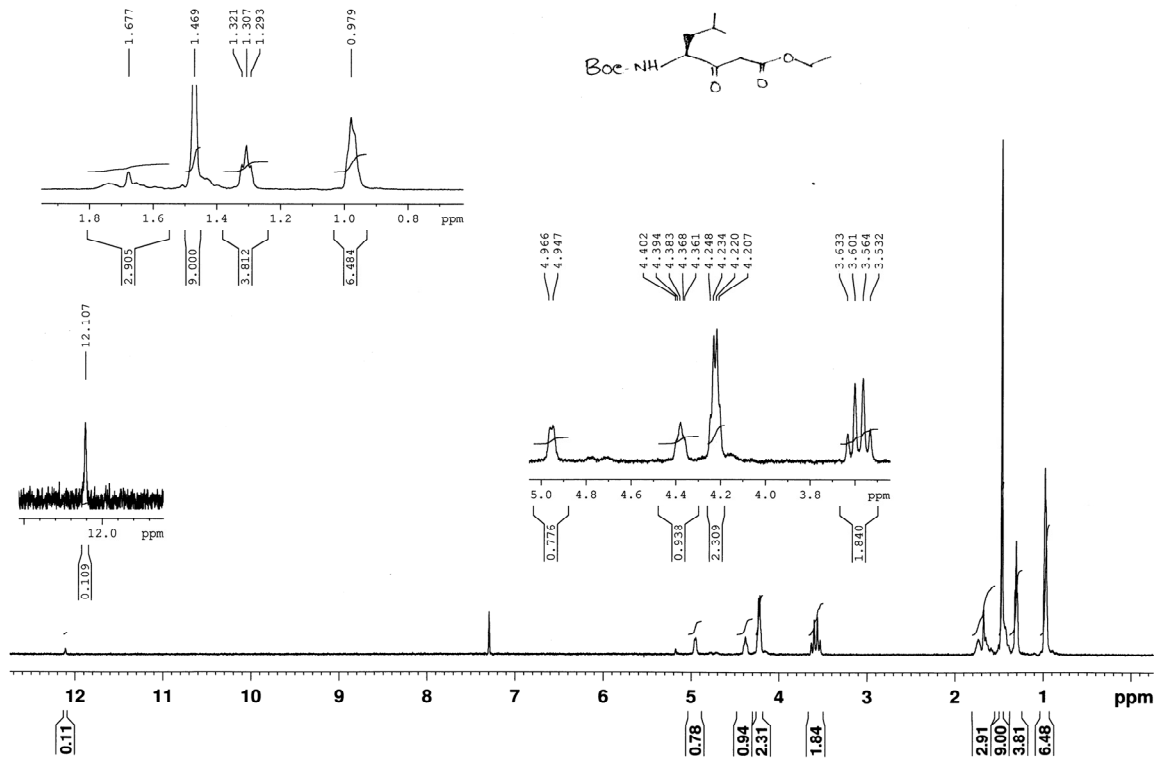

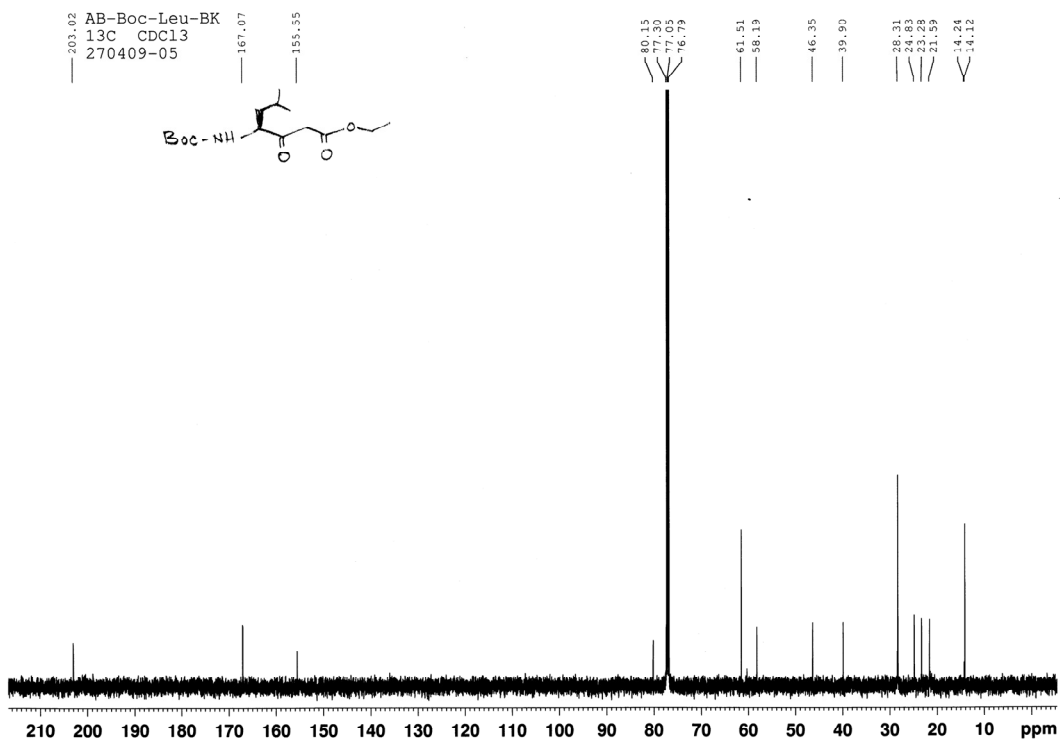

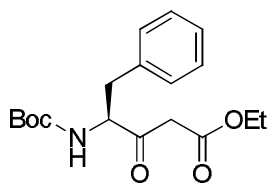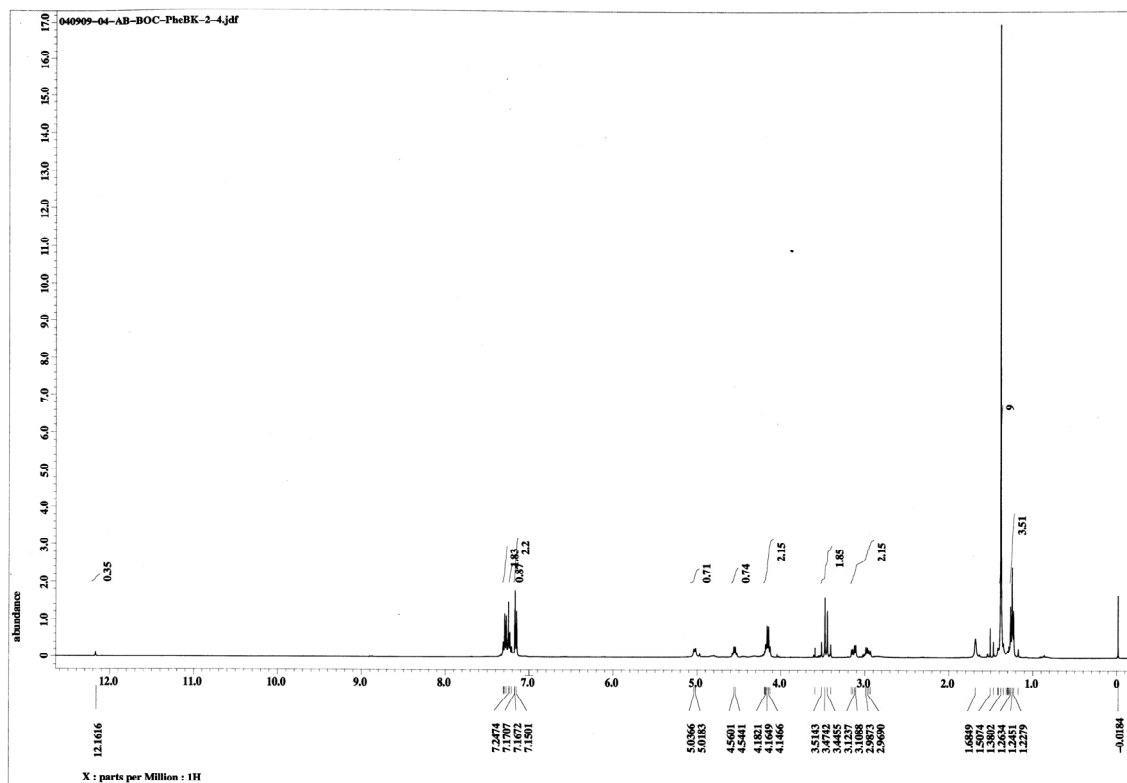

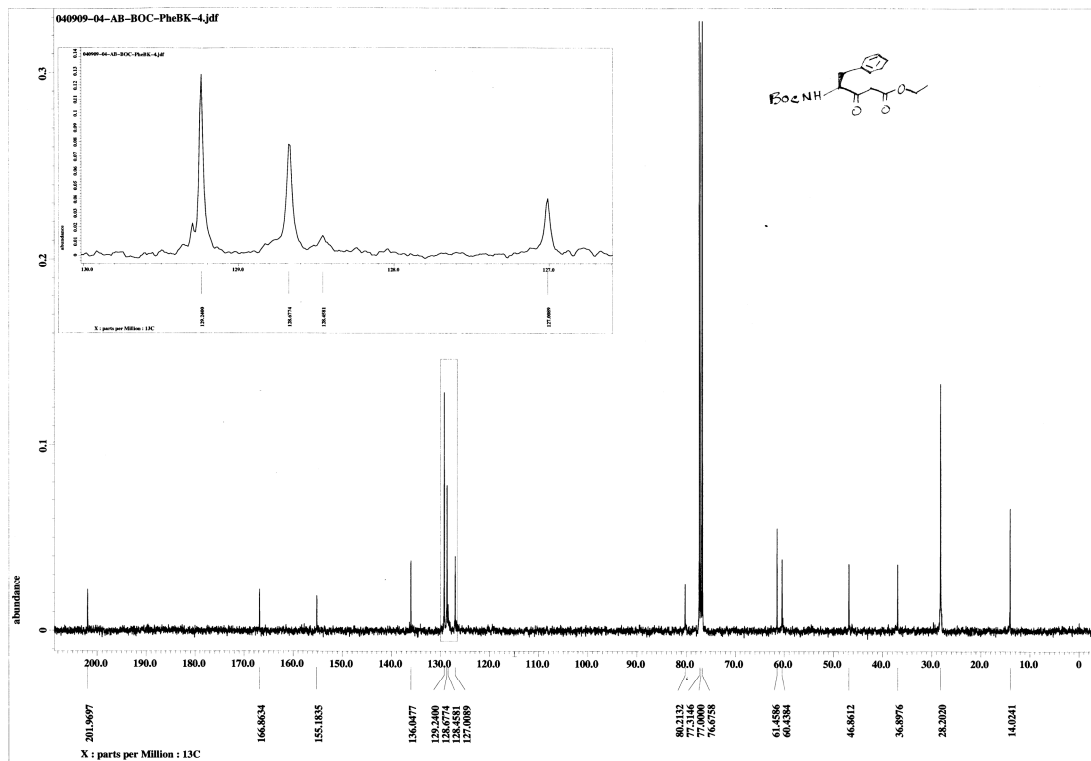



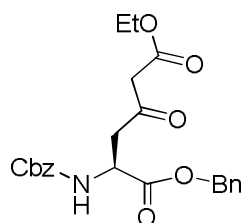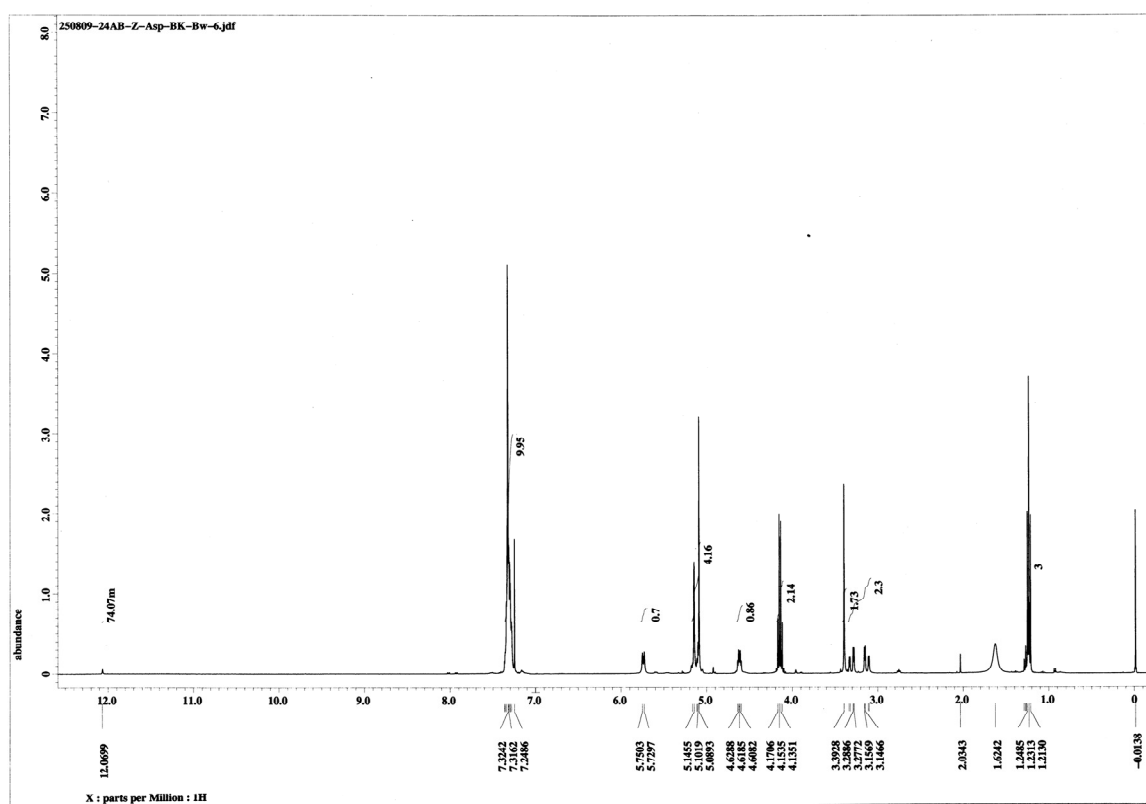

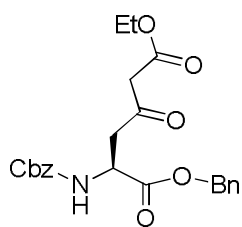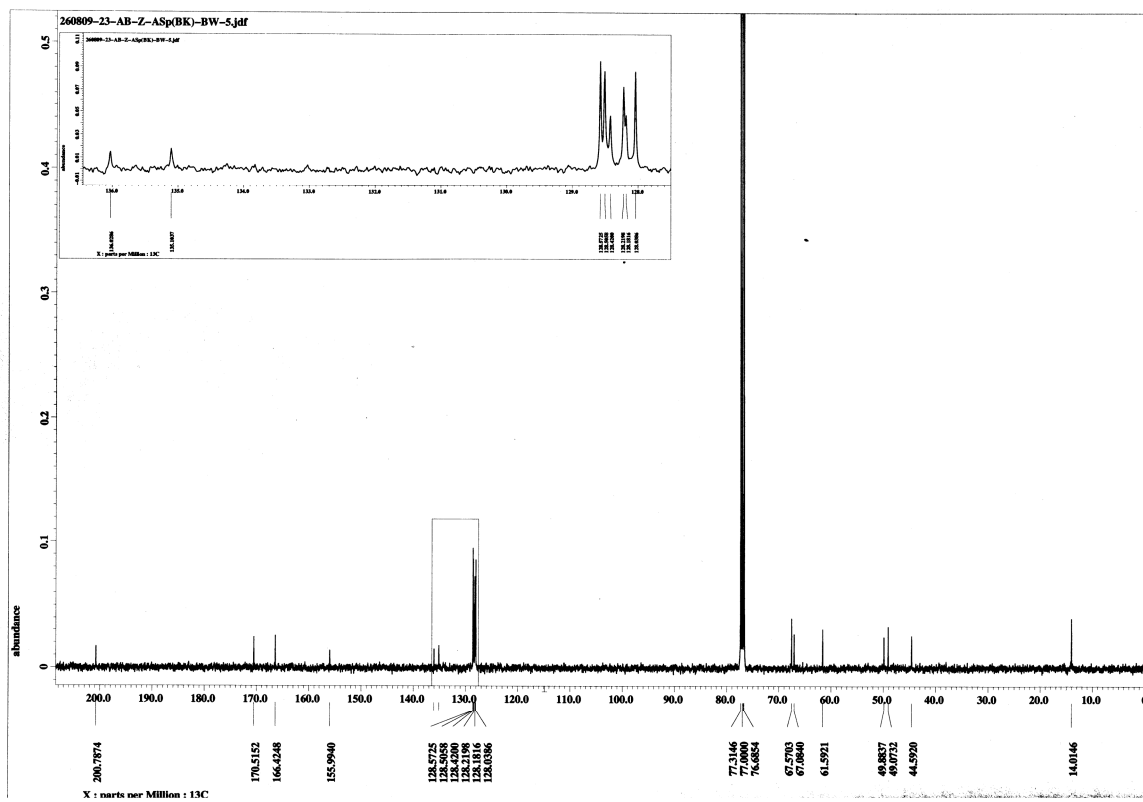

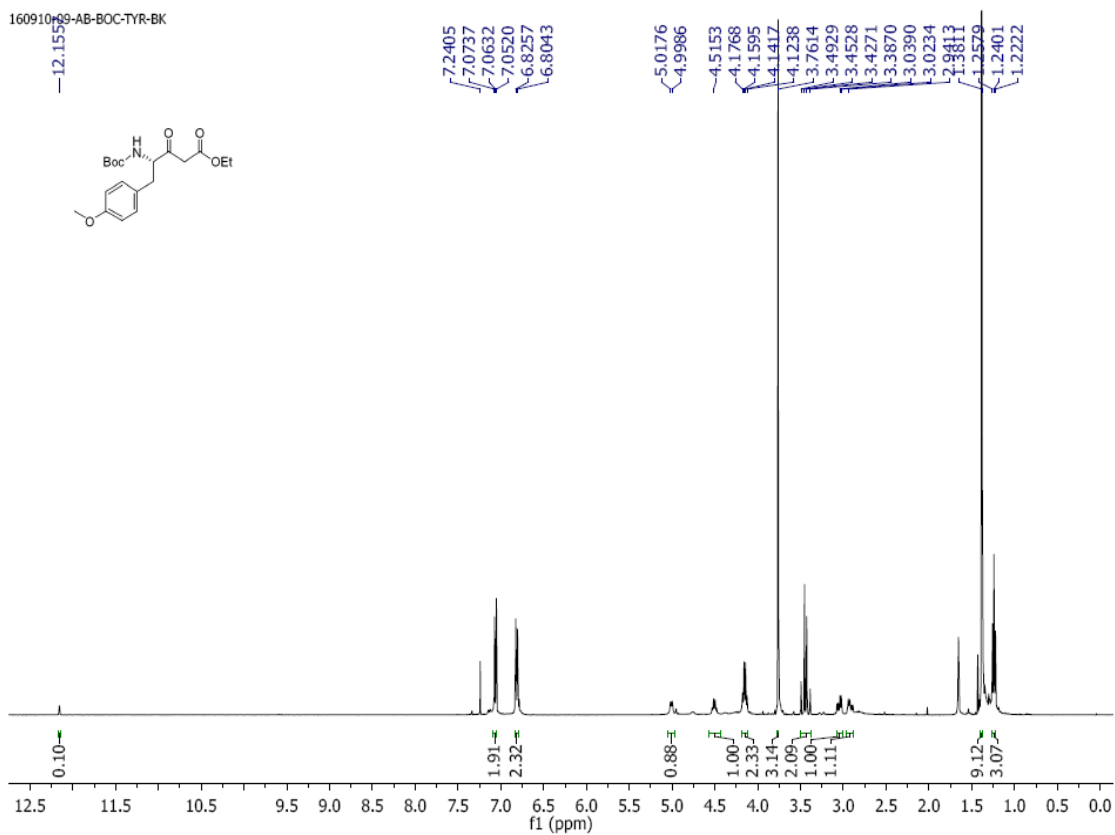

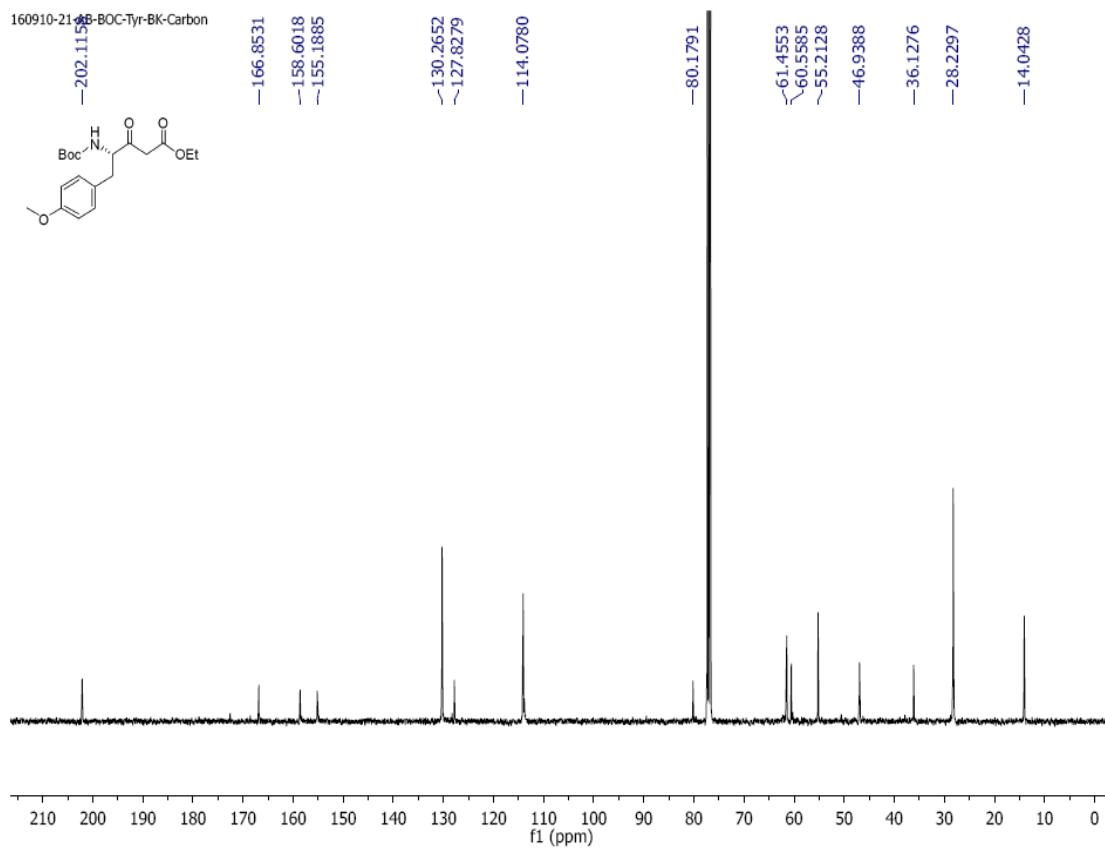

020210-10AB-BOC-Pro-BK

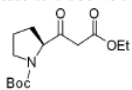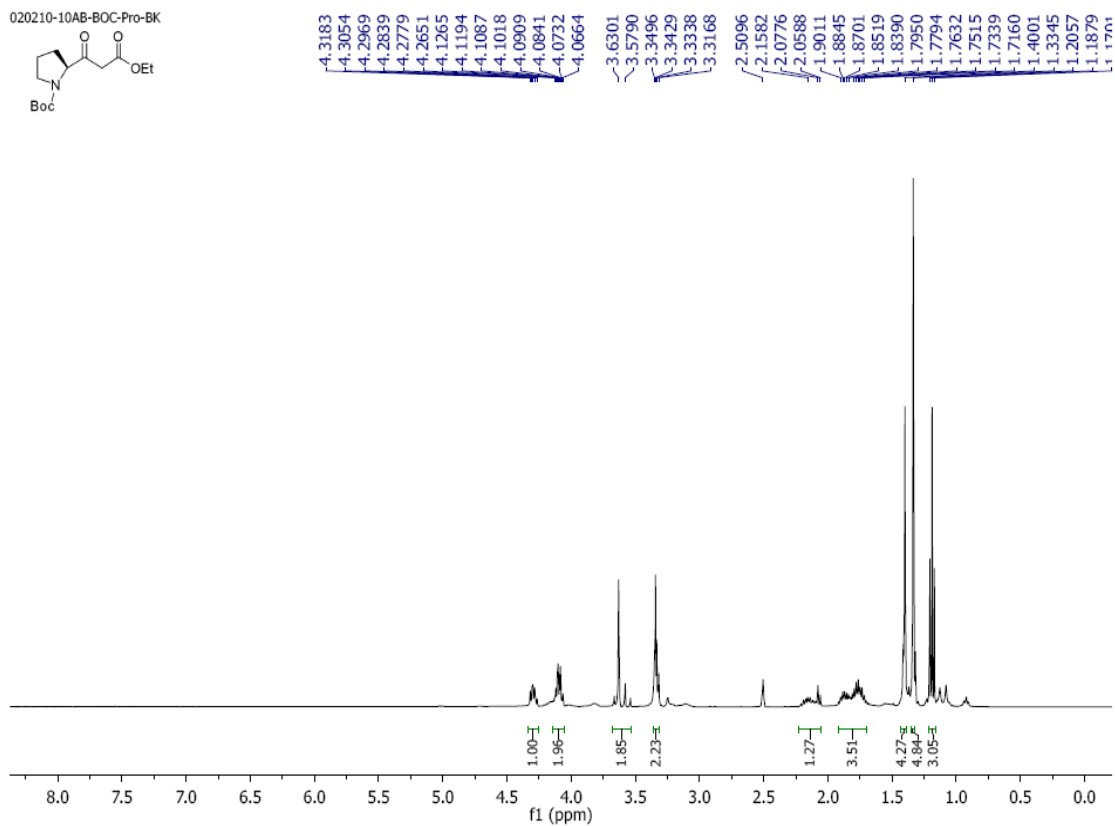

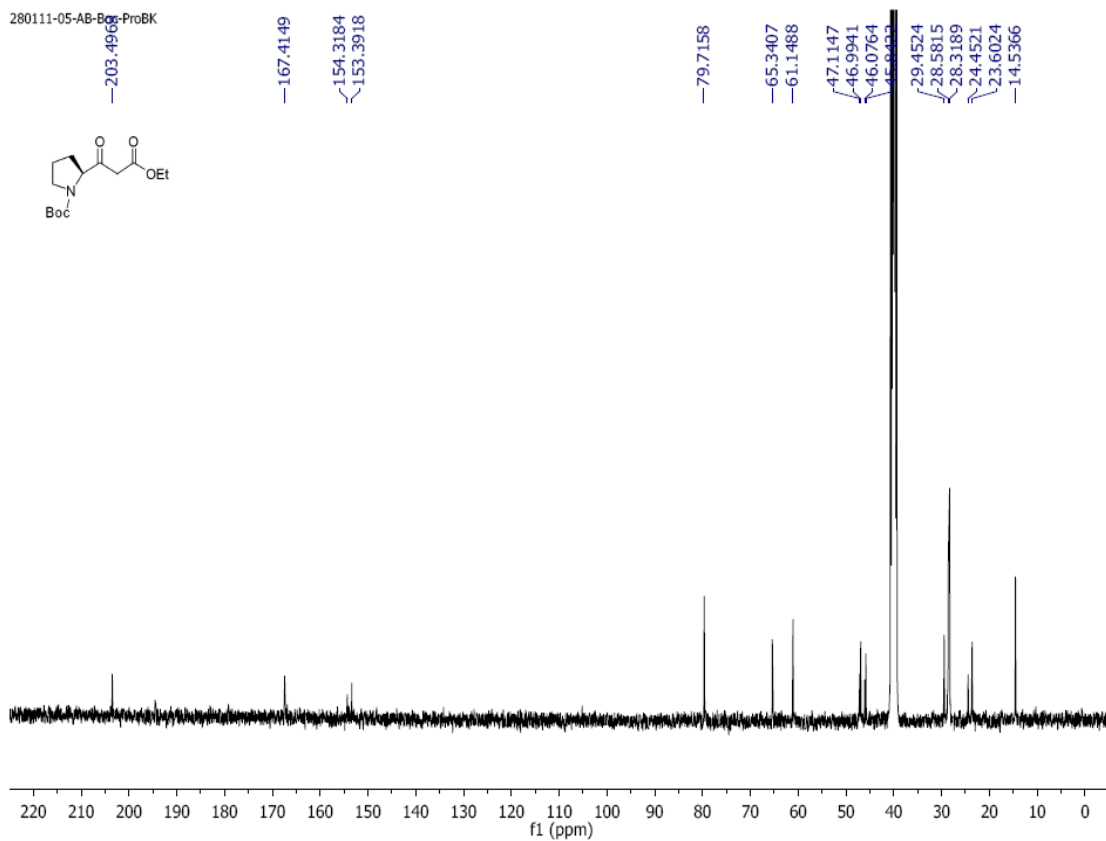

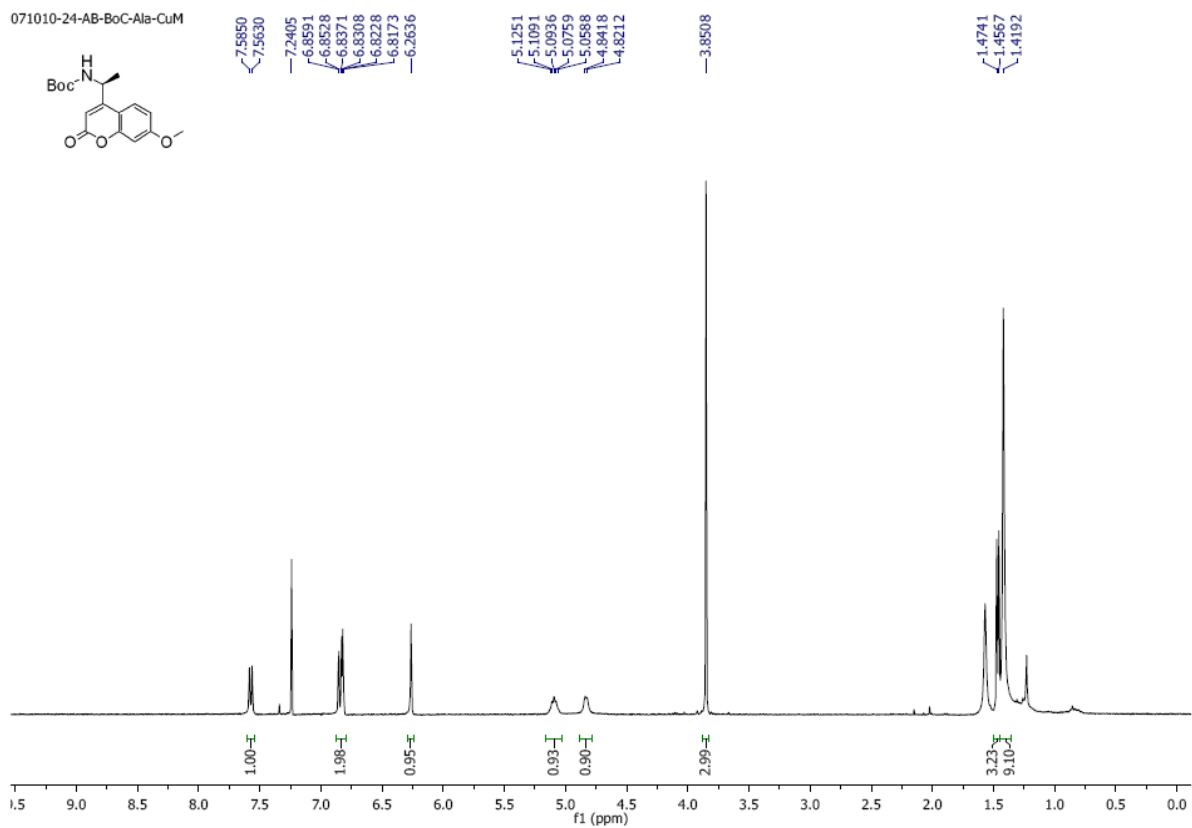

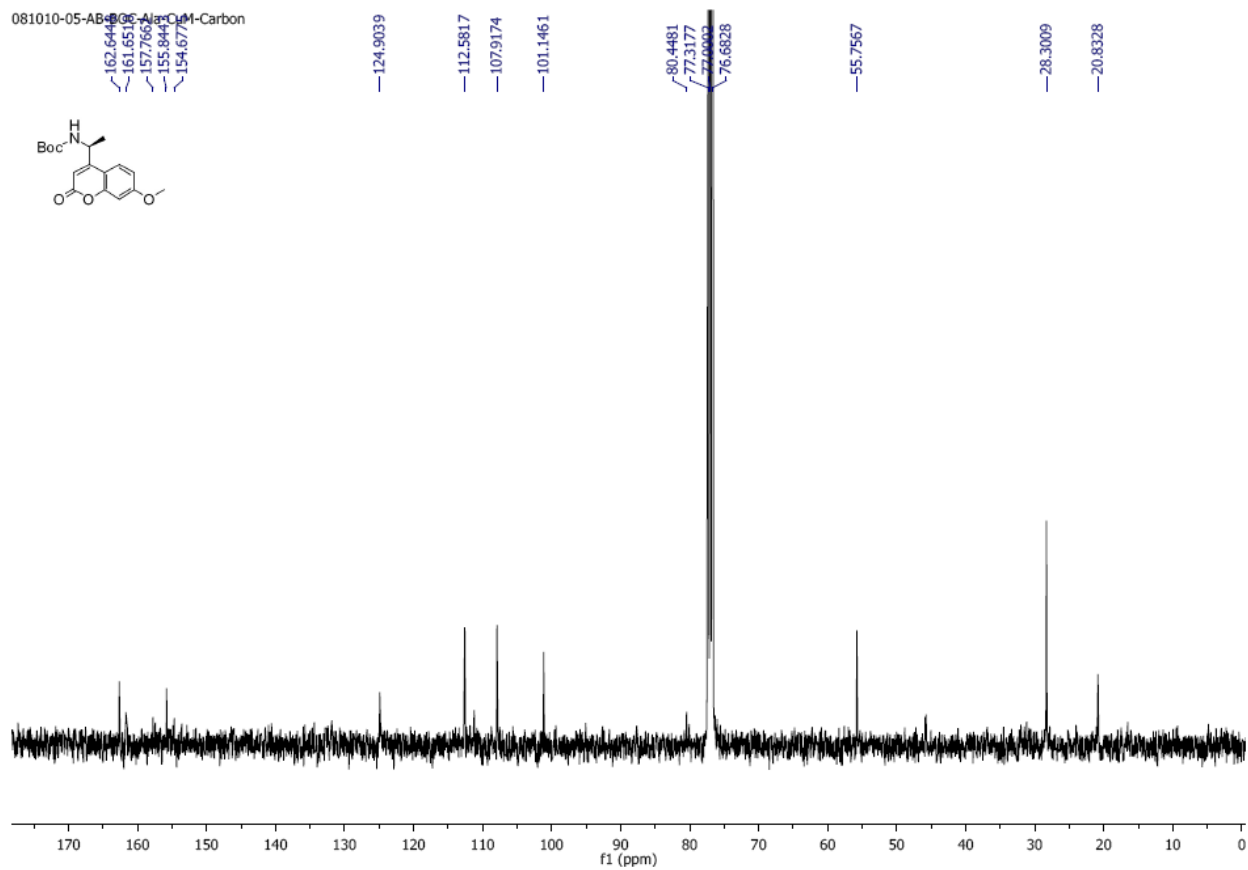



100311-22-AB-R-AlaCM

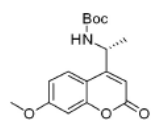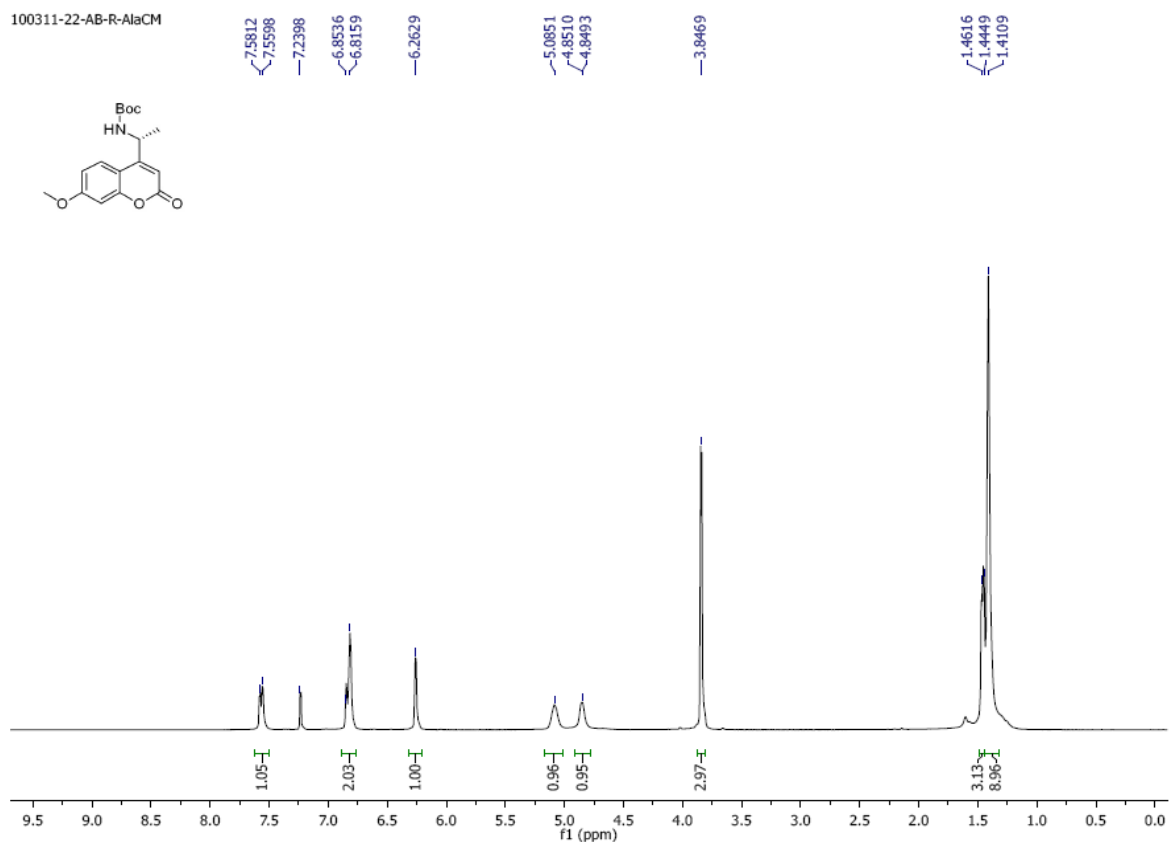

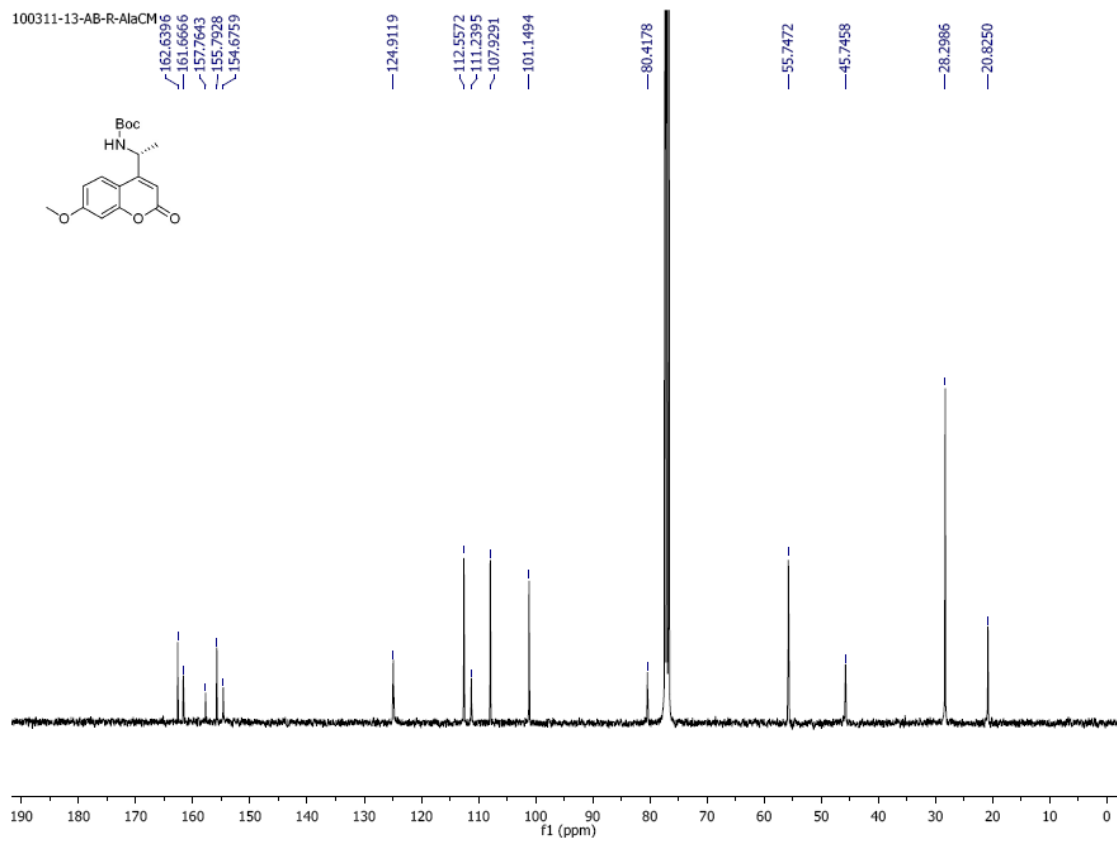

270910-20-AB-F-Cu

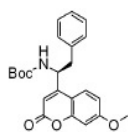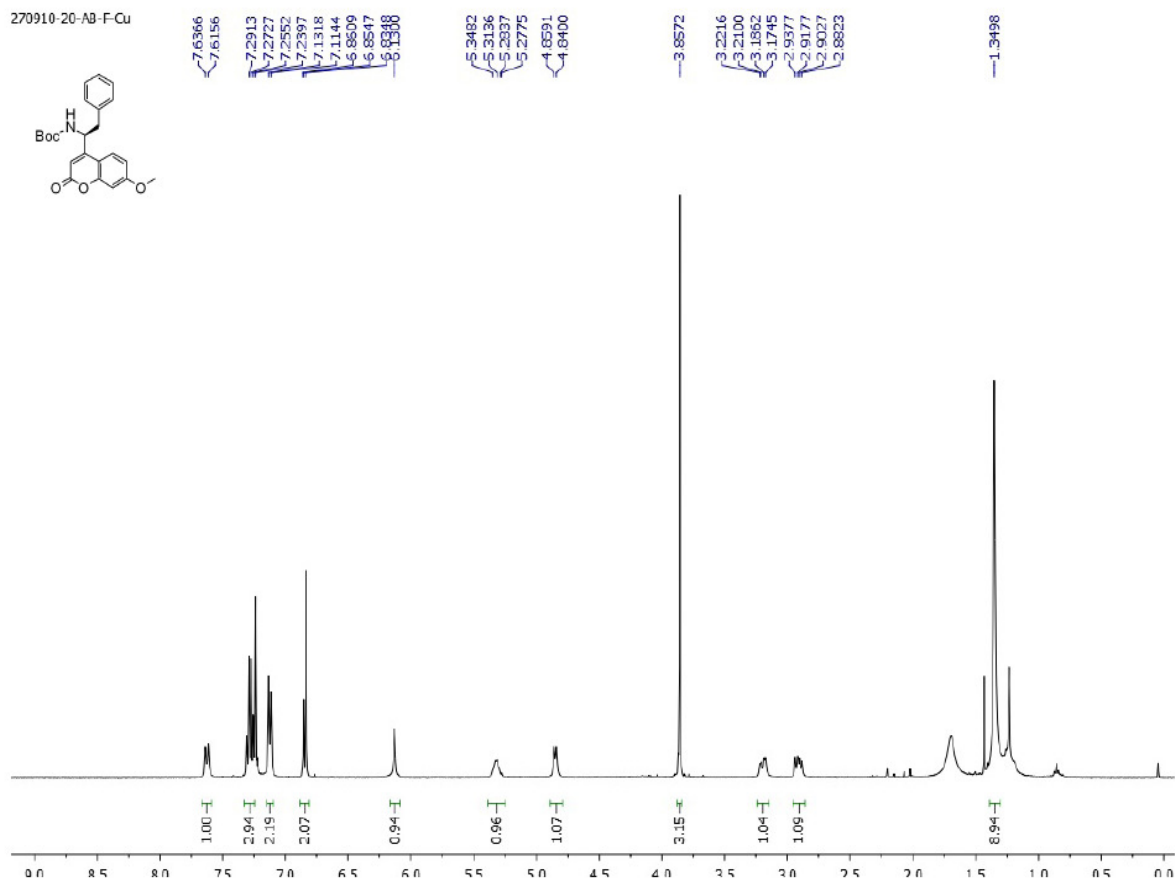

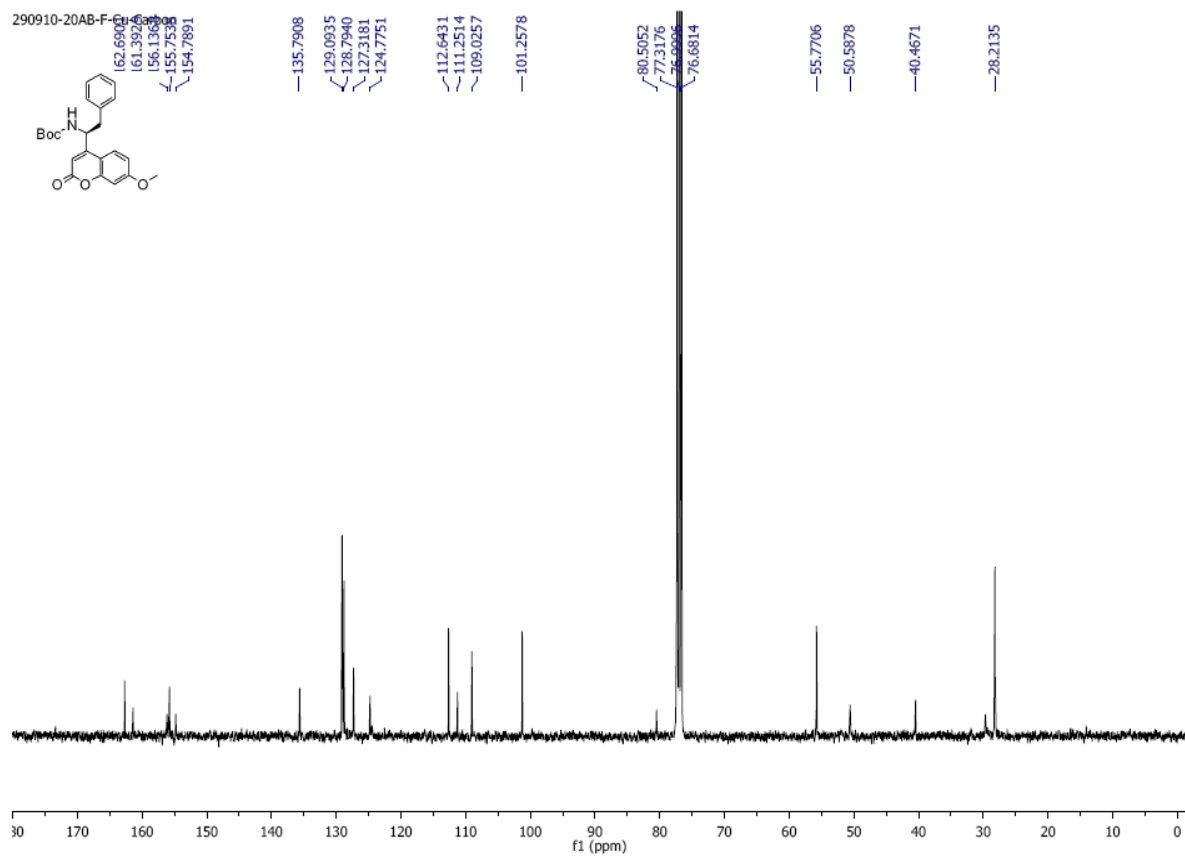

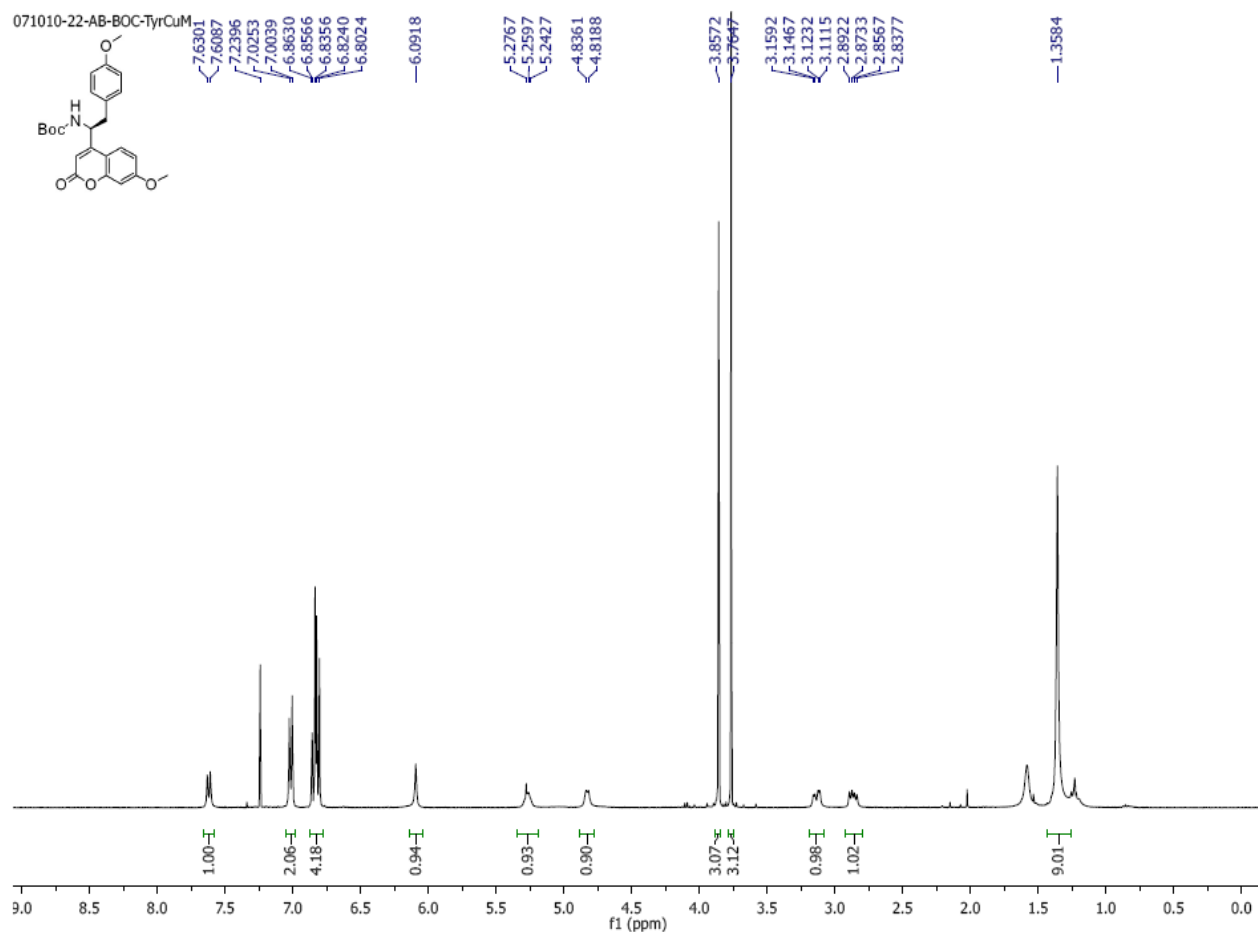

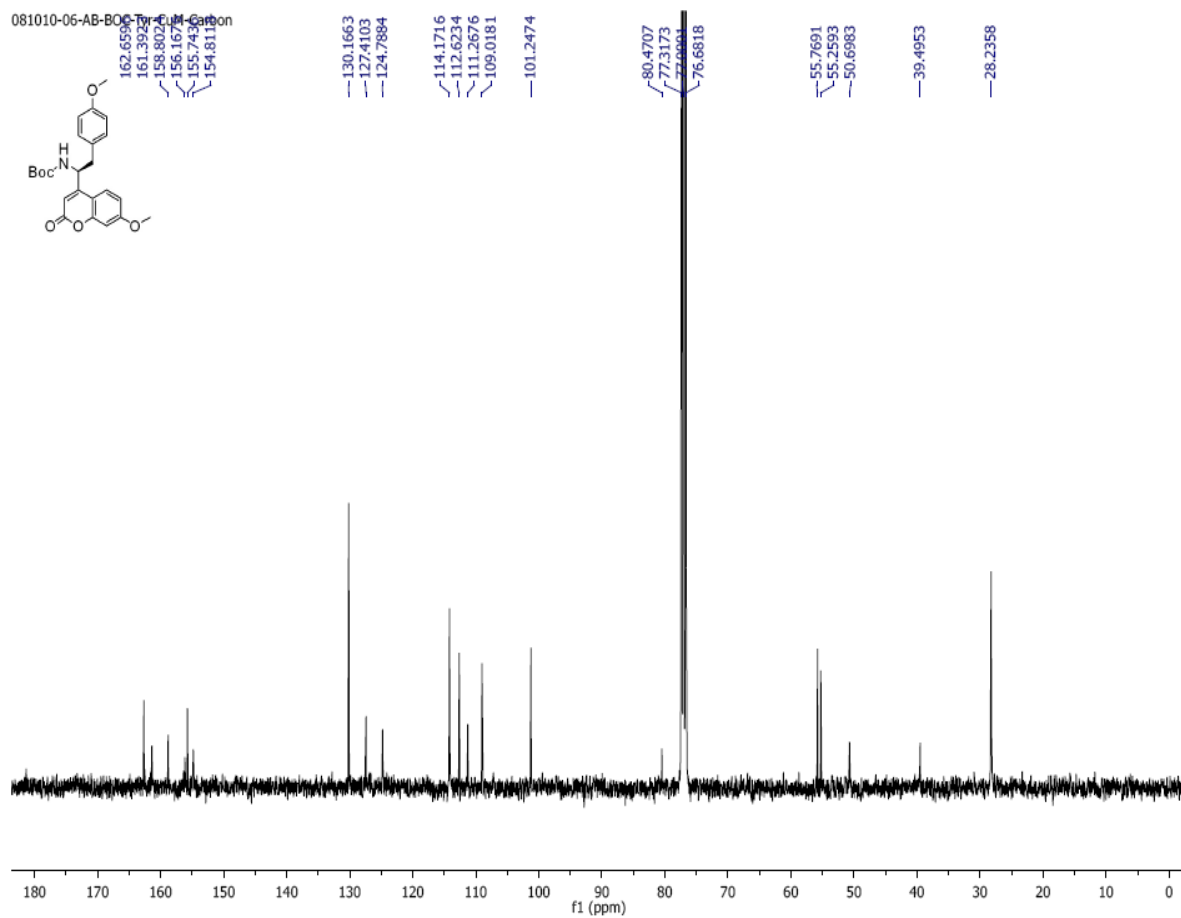

S#445735

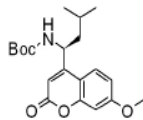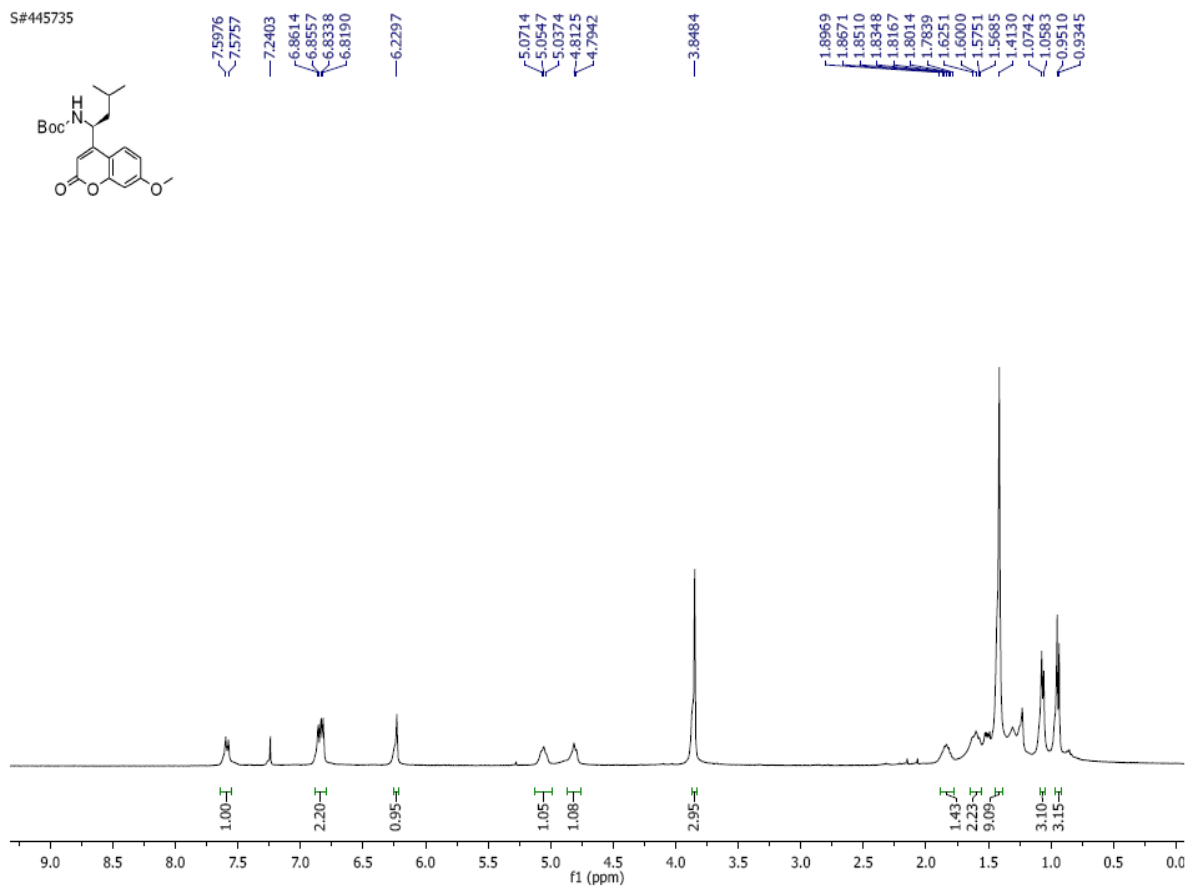

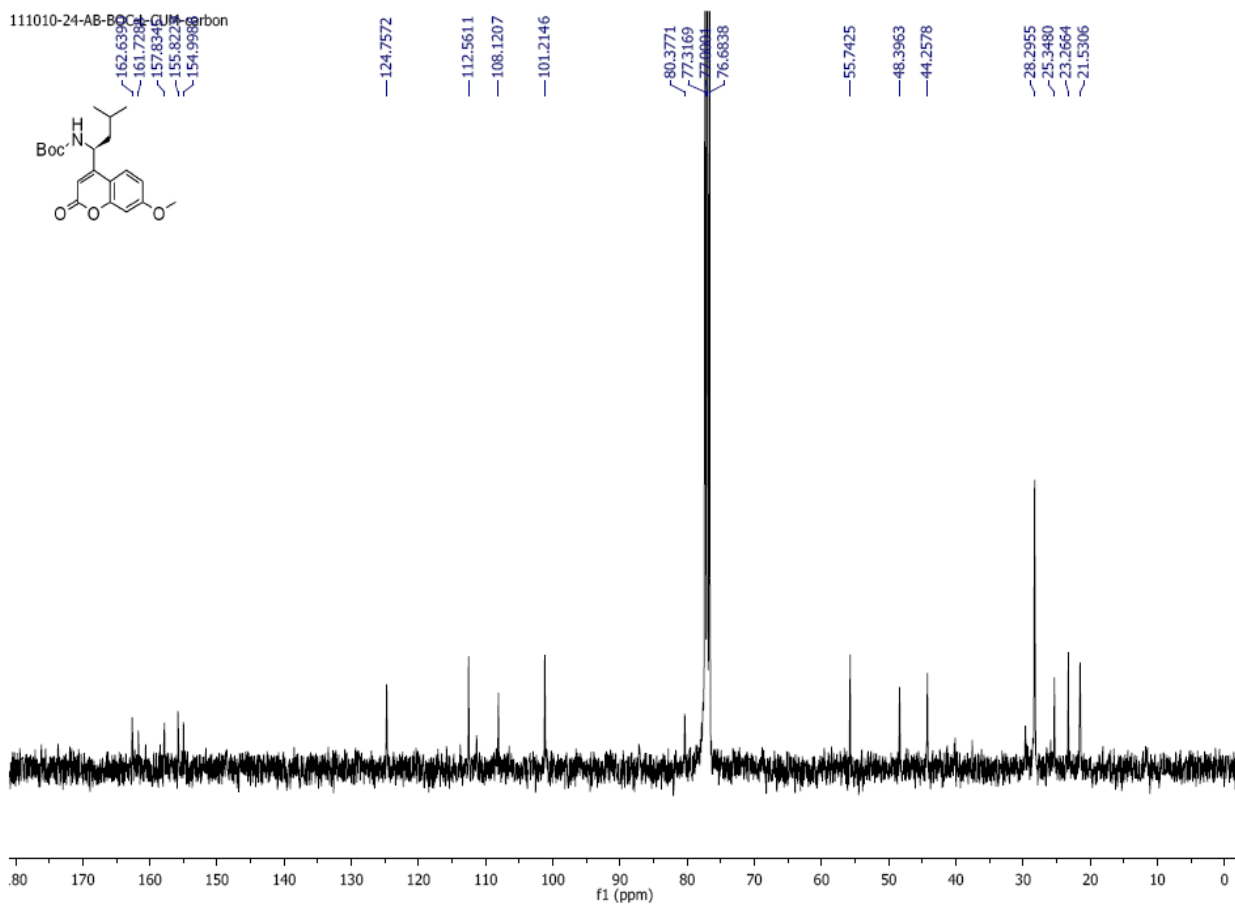



S#412377

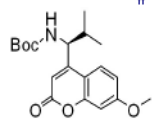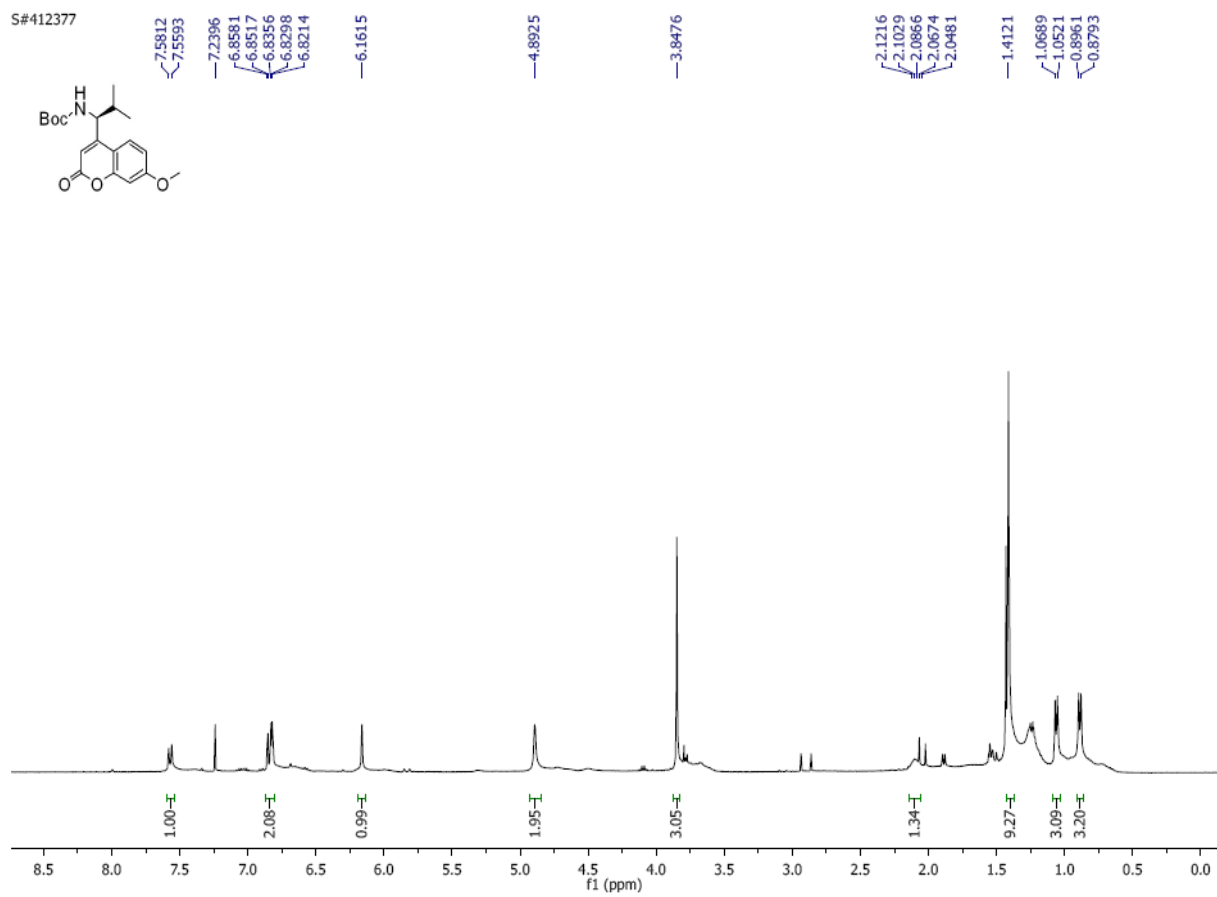

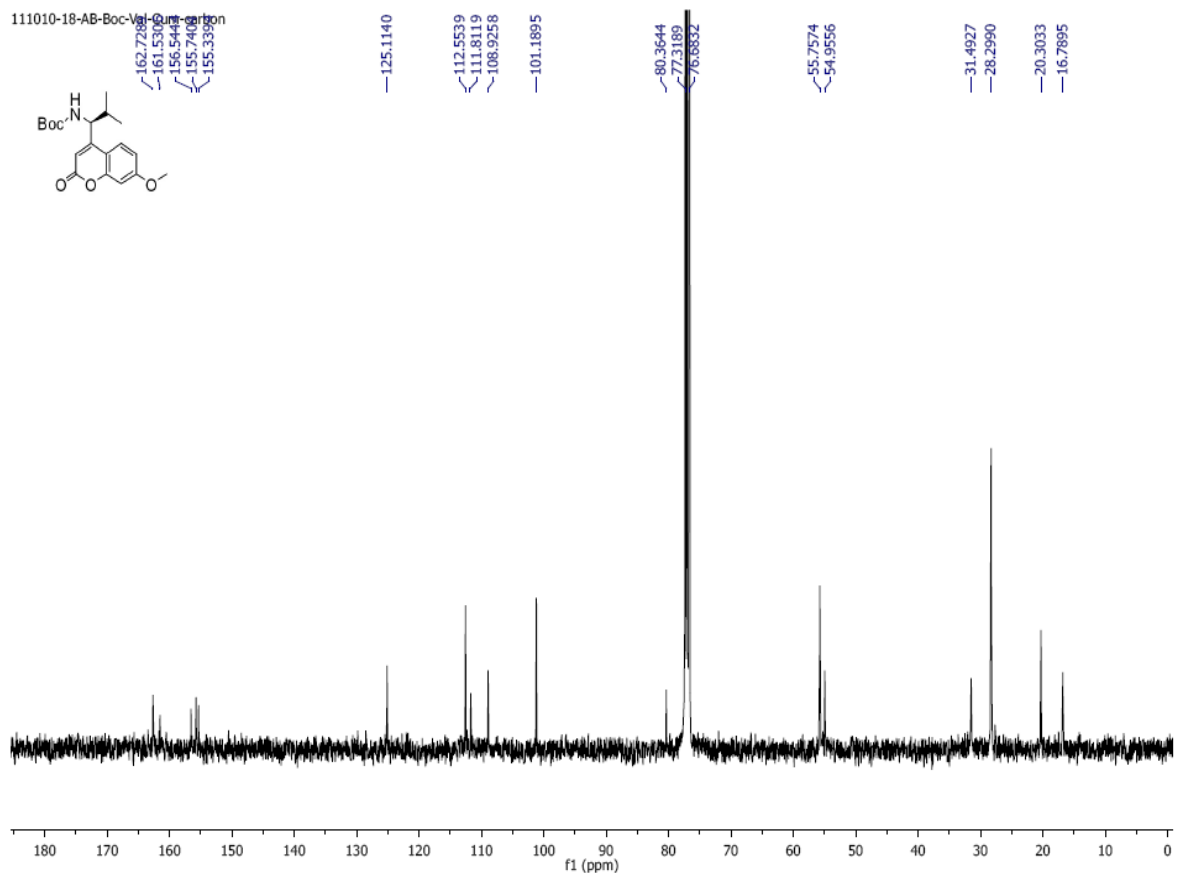

011210-15-AB-Pro-CUM

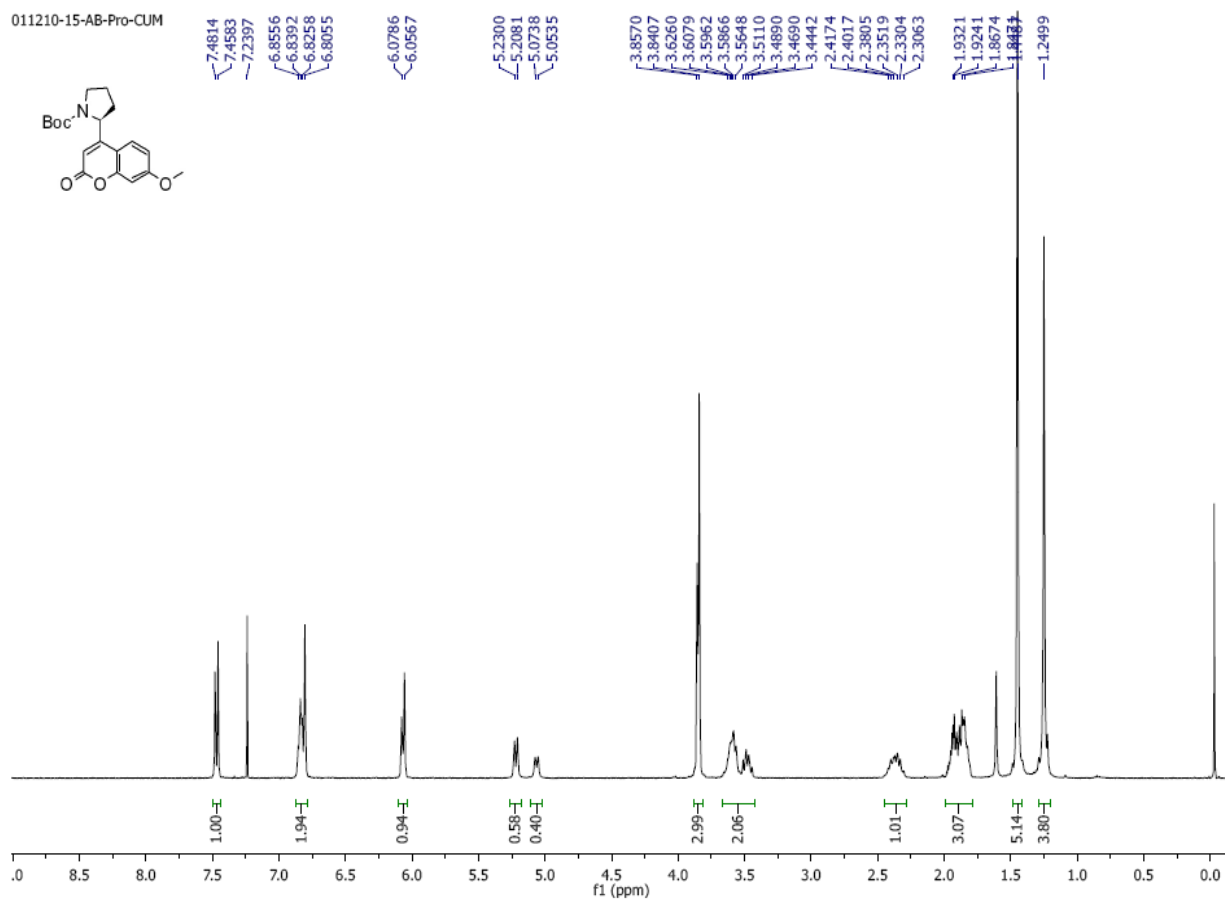

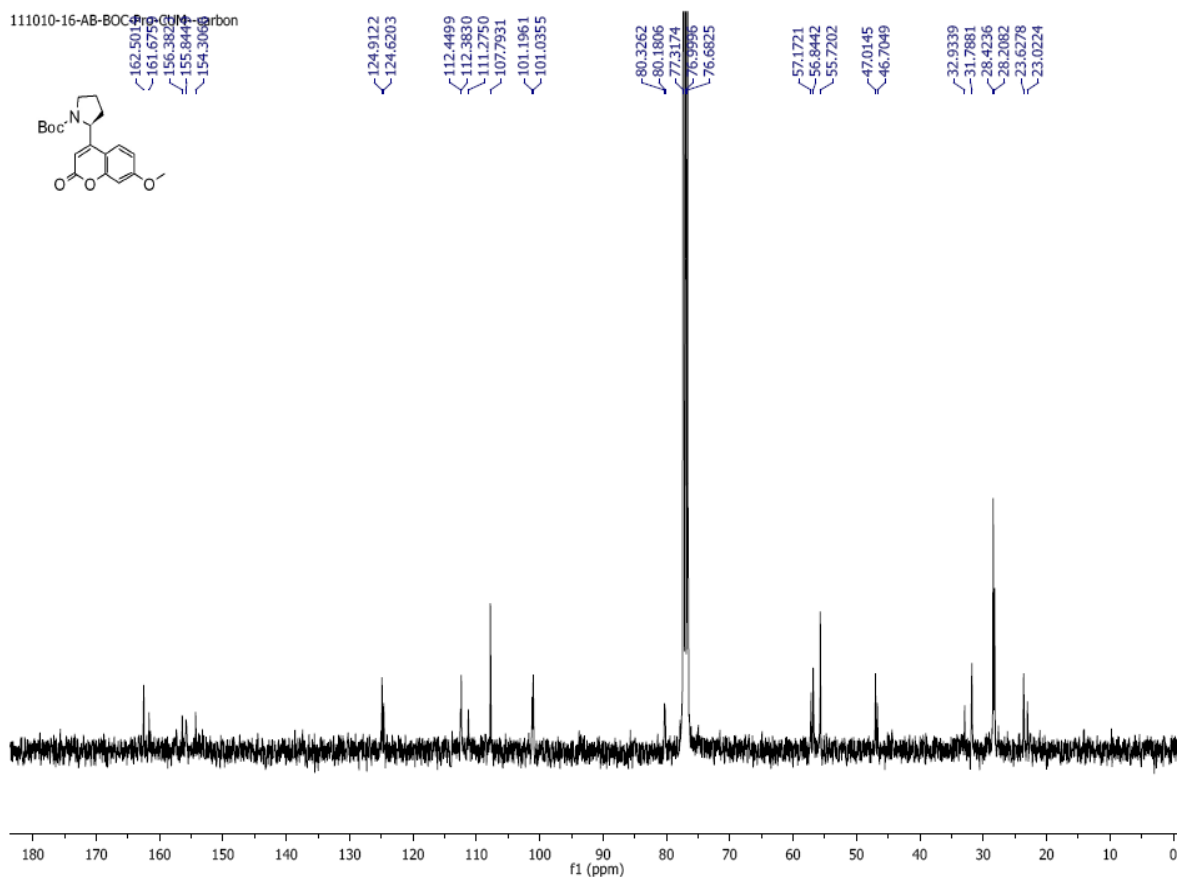

260809-26AB-Fmoc-FL-OH

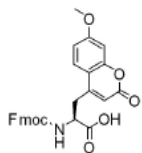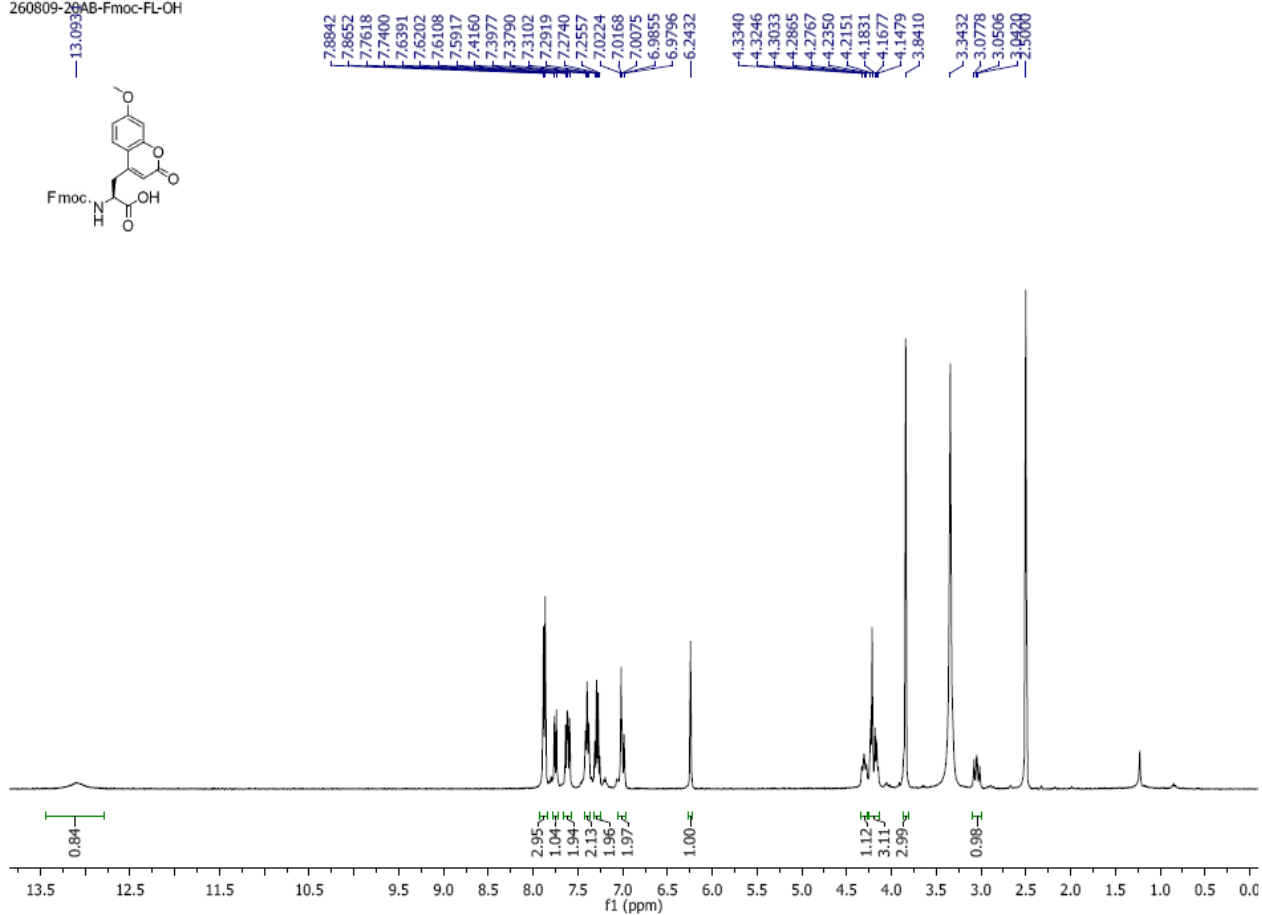

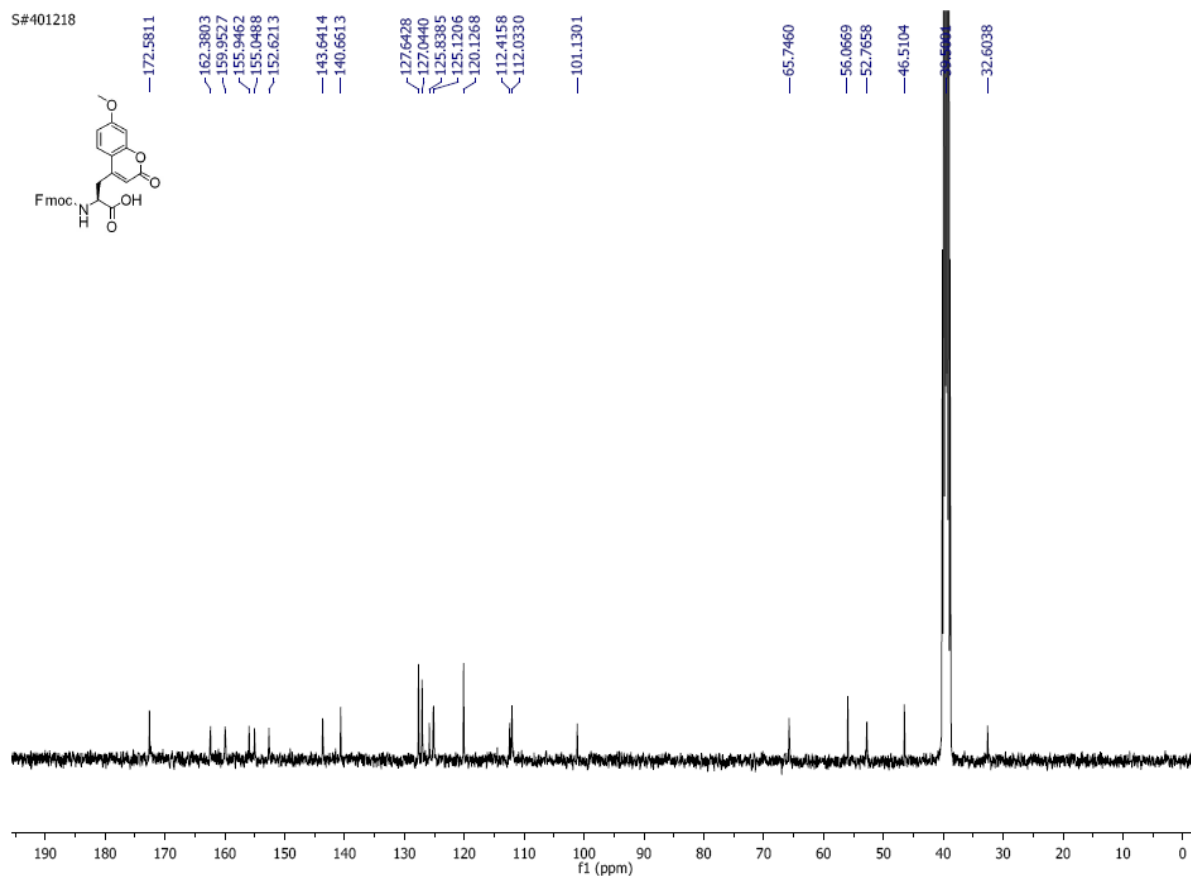

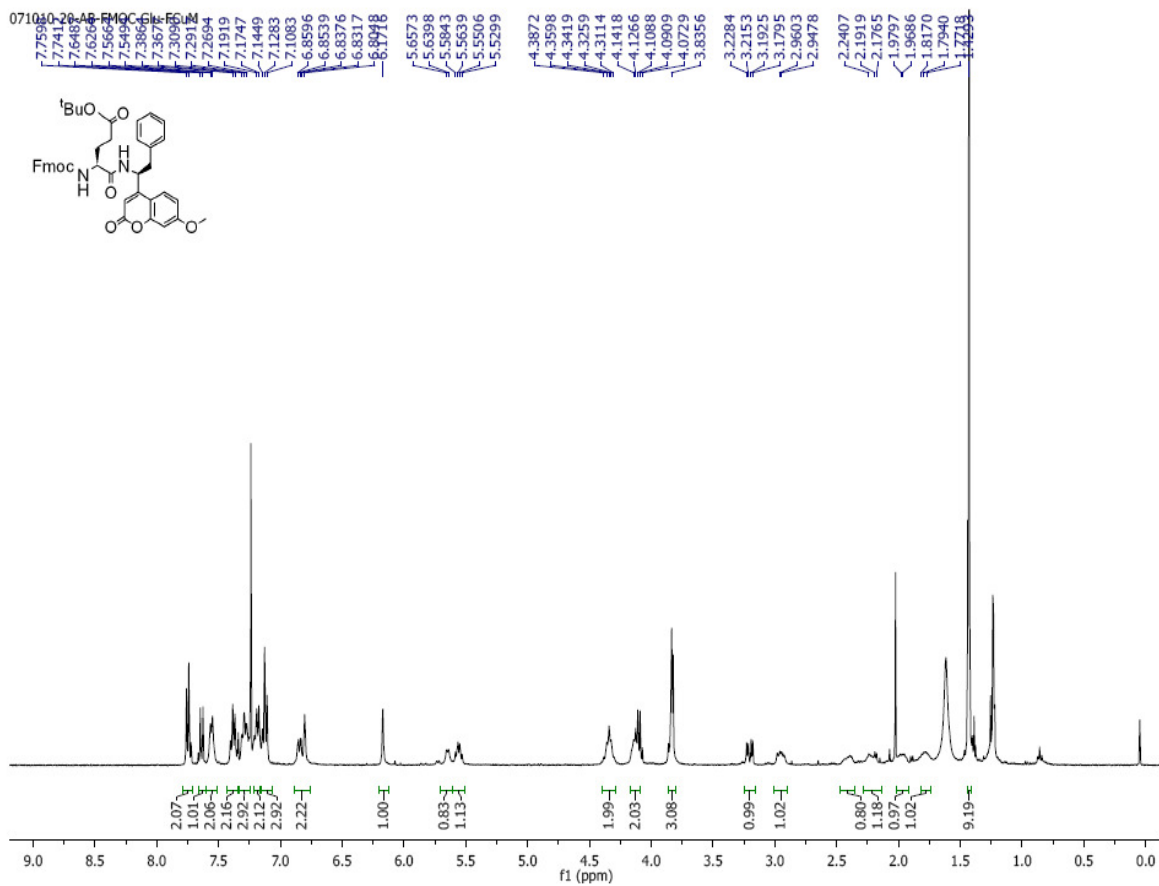

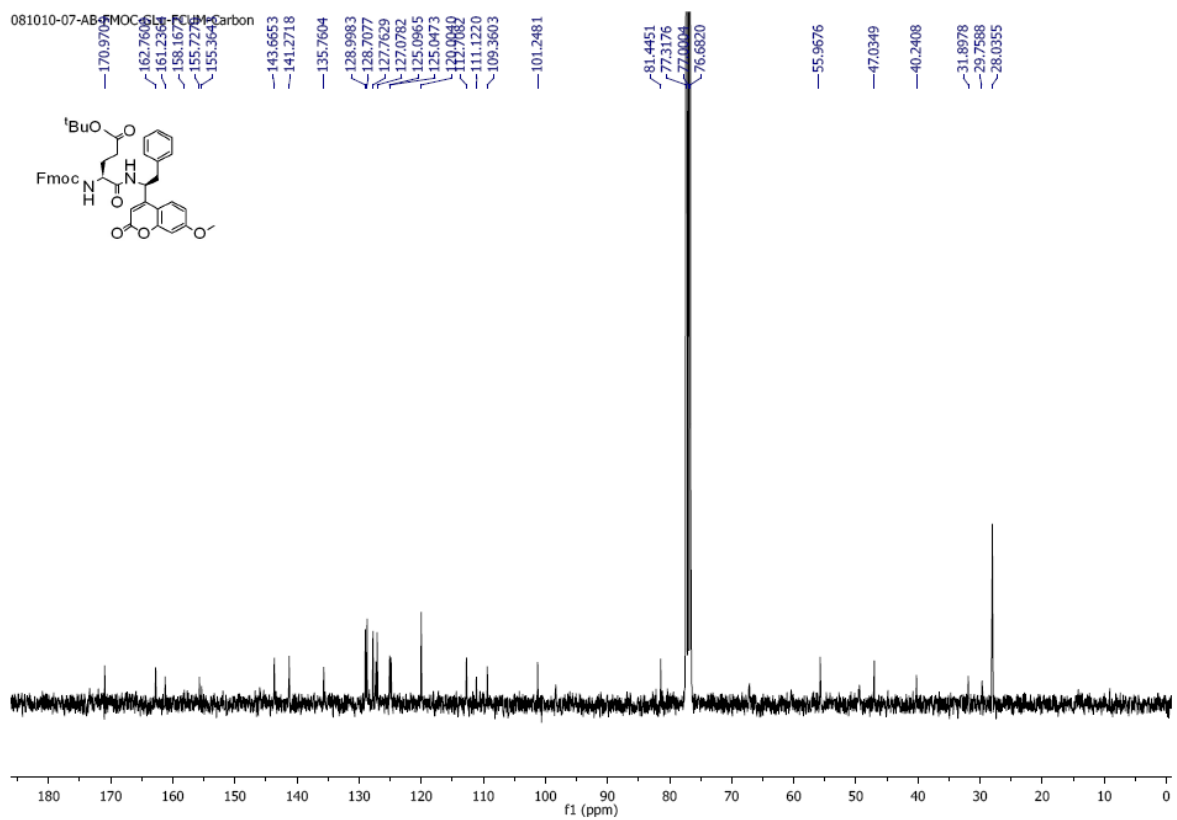



### Spectrum Report

Final - Shots 25 - HNG GROUP; Run #192; Label M20

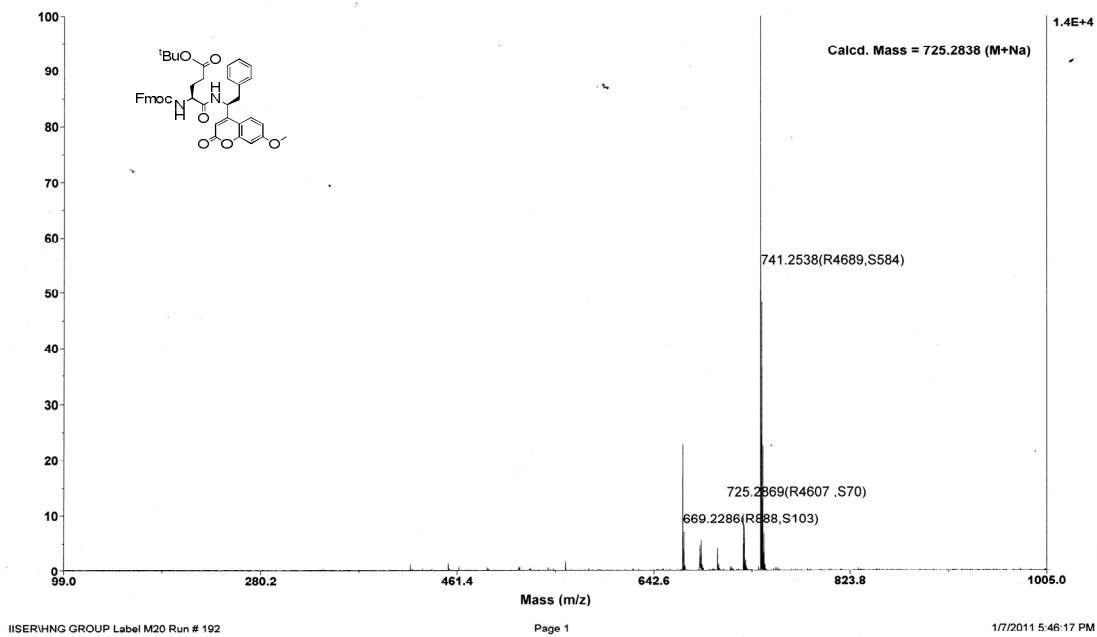

### HPLC profile of Fmoc-Glu(OBu<sup>t</sup>)-PheCoumarin

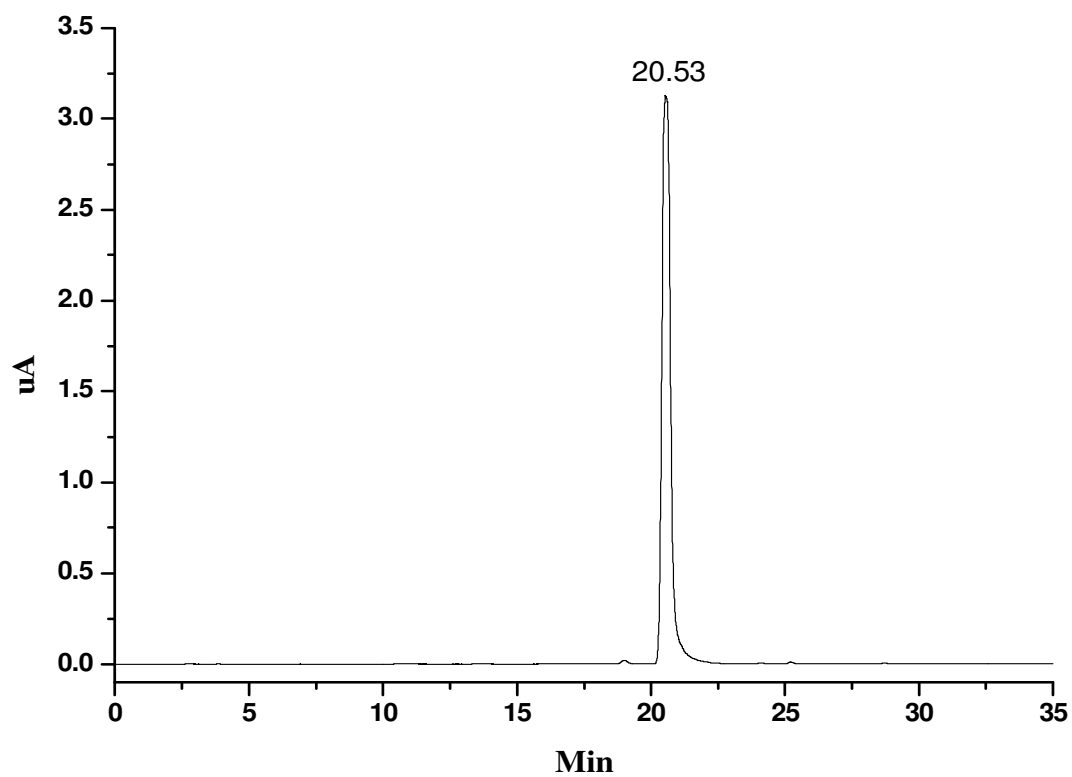

Figure 7: Analytical reverse phase HPLC profile of dipeptide 4 in methanol/water gradient system;  $\lambda=254$  nm, gradient 60 to 95 % MeOH in 0  $\rightarrow$ 35 min.

## MALDI TOF/TOF mass of Coumarin Tagged HIV-1 TAT peptide

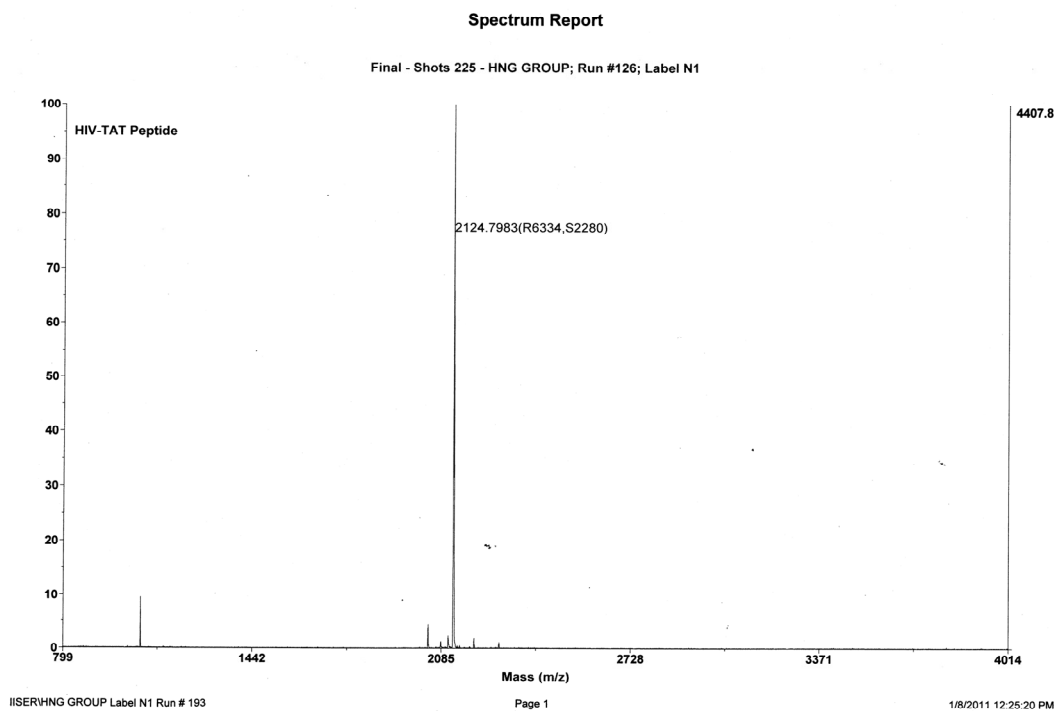

### HPLC profile of Coumarin Tagged HIV-1 TAT Peptide

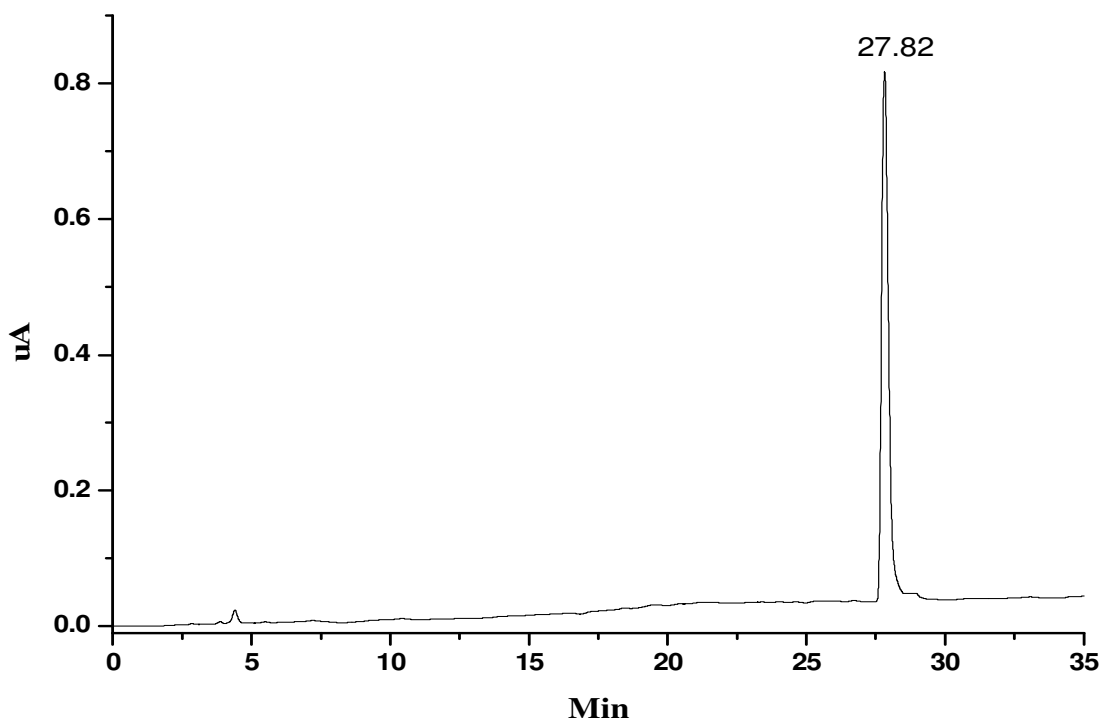

Figure 8: Analytical reverse phase HPLC profile of P1 in acetonitrile/water gradient system;  $\lambda=220$  nm, gradient 20 to 95 % acetonitrile in 0  $\rightarrow$ 35 min.
